# Supplementary material
Source: PubMed Central journal article supplement (PMC4140985)
Supplement: NIHMS613229-supplement-supplement_1.pdf [file NIHMS613229-supplement-supplement_1.pdf]

# SUPPLEMENTARY MATERIALS

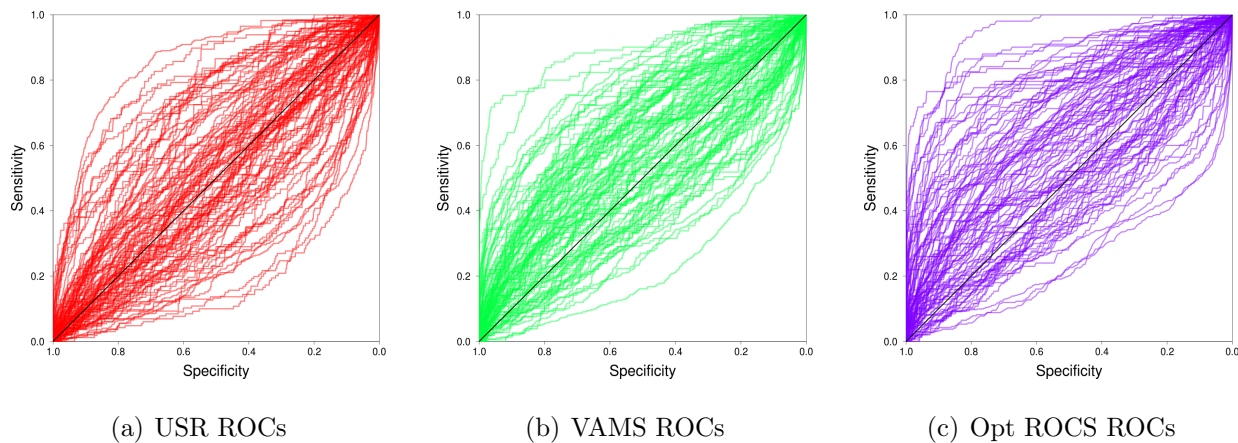

**Figure S1:** The receiver operating characteristic curves for a selection of shape-based virtual screening algorithms. These curves plot the specificity (true negative rate) with respect to the sensitivity (true positive rate) as the threshold for classification is changed.

**Table S1:** Area under the curve (AUC) of ROC curves for various shape-based virtual screening algorithms.

| Target |       |       |            |          | Color | Color      | Color    |
|--------|-------|-------|------------|----------|-------|------------|----------|
|        | USR   | VAMS  | Unopt ROCS | Opt ROCS | USR   | Unopt ROCS | Opt Rocs |
| aa2ar  | 0.507 | 0.562 | 0.569      | 0.601    | 0.533 | 0.606      | 0.705    |
| abl1   | 0.348 | 0.434 | 0.509      | 0.552    | 0.338 | 0.514      | 0.614    |
| ace    | 0.593 | 0.624 | 0.587      | 0.596    | 0.751 | 0.613      | 0.694    |
| aces   | 0.265 | 0.226 | 0.212      | 0.261    | 0.278 | 0.242      | 0.517    |
| ada    | 0.525 | 0.622 | 0.566      | 0.735    | 0.689 | 0.629      | 0.888    |
| ada17  | 0.390 | 0.439 | 0.462      | 0.446    | 0.459 | 0.470      | 0.636    |
| adrb1  | 0.385 | 0.469 | 0.438      | 0.378    | 0.397 | 0.426      | 0.465    |
| adrb2  | 0.424 | 0.476 | 0.429      | 0.382    | 0.367 | 0.413      | 0.430    |
| akt1   | 0.358 | 0.412 | 0.304      | 0.275    | 0.401 | 0.274      | 0.370    |
| akt2   | 0.388 | 0.364 | 0.366      | 0.376    | 0.398 | 0.369      | 0.412    |
| aldr   | 0.541 | 0.587 | 0.629      | 0.639    | 0.282 | 0.636      | 0.685    |
| ampc   | 0.528 | 0.641 | 0.625      | 0.583    | 0.725 | 0.661      | 0.758    |
| andr   | 0.535 | 0.589 | 0.533      | 0.569    | 0.685 | 0.570      | 0.691    |
| aofb   | 0.315 | 0.418 | 0.436      | 0.397    | 0.364 | 0.440      | 0.379    |
| bace1  | 0.480 | 0.436 | 0.306      | 0.320    | 0.483 | 0.315      | 0.313    |
| braf   | 0.391 | 0.476 | 0.465      | 0.533    | 0.637 | 0.474      | 0.581    |
| cah2   | 0.374 | 0.436 | 0.447      | 0.460    | 0.354 | 0.426      | 0.512    |
| casp3  | 0.542 | 0.464 | 0.458      | 0.455    | 0.581 | 0.445      | 0.514    |

| Target | USR   | VAMS  | Unopt ROCS | Opt ROCS | Color<br>USR | Color<br>Unopt ROCS | Color<br>Opt Rocs |
|--------|-------|-------|------------|----------|--------------|---------------------|-------------------|
| cdk2   | 0.567 | 0.673 | 0.701      | 0.724    | 0.694        | 0.715               | 0.703             |
| comt   | 0.486 | 0.568 | 0.529      | 0.630    | 0.626        | 0.521               | 0.904             |
| cp2c9  | 0.442 | 0.455 | 0.435      | 0.434    | 0.421        | 0.452               | 0.457             |
| cp3a4  | 0.529 | 0.542 | 0.540      | 0.549    | 0.509        | 0.510               | 0.511             |
| csflr  | 0.444 | 0.539 | 0.576      | 0.635    | 0.510        | 0.608               | 0.664             |
| cxcr4  | 0.620 | 0.715 | 0.735      | 0.779    | 0.646        | 0.741               | 0.782             |
| def    | 0.577 | 0.704 | 0.658      | 0.748    | 0.774        | 0.654               | 0.860             |
| dhi1   | 0.518 | 0.655 | 0.628      | 0.680    | 0.464        | 0.623               | 0.617             |
| dpp4   | 0.647 | 0.633 | 0.643      | 0.655    | 0.643        | 0.647               | 0.681             |
| drd3   | 0.281 | 0.333 | 0.324      | 0.299    | 0.189        | 0.315               | 0.312             |
| dyr    | 0.389 | 0.390 | 0.404      | 0.444    | 0.643        | 0.473               | 0.735             |
| egfr   | 0.489 | 0.549 | 0.578      | 0.662    | 0.532        | 0.625               | 0.769             |
| esr1   | 0.475 | 0.579 | 0.596      | 0.648    | 0.686        | 0.619               | 0.734             |
| esr2   | 0.475 | 0.582 | 0.587      | 0.648    | 0.815        | 0.678               | 0.783             |
| fa10   | 0.650 | 0.640 | 0.636      | 0.656    | 0.601        | 0.641               | 0.712             |
| fa7    | 0.620 | 0.536 | 0.602      | 0.522    | 0.857        | 0.599               | 0.614             |
| fabp4  | 0.740 | 0.752 | 0.752      | 0.801    | 0.379        | 0.744               | 0.788             |
| fak1   | 0.490 | 0.645 | 0.749      | 0.865    | 0.690        | 0.771               | 0.949             |
| fgfr1  | 0.228 | 0.368 | 0.402      | 0.438    | 0.293        | 0.421               | 0.557             |
| fbk1a  | 0.547 | 0.662 | 0.585      | 0.638    | 0.377        | 0.561               | 0.622             |
| fnta   | 0.552 | 0.619 | 0.547      | 0.659    | 0.599        | 0.557               | 0.777             |
| fpps   | 0.785 | 0.850 | 0.820      | 0.872    | 0.631        | 0.825               | 0.986             |
| gcr    | 0.500 | 0.494 | 0.419      | 0.490    | 0.627        | 0.446               | 0.592             |
| glcm   | 0.400 | 0.388 | 0.424      | 0.439    | 0.492        | 0.428               | 0.519             |
| gria2  | 0.450 | 0.472 | 0.543      | 0.622    | 0.509        | 0.562               | 0.681             |
| grik1  | 0.452 | 0.573 | 0.656      | 0.633    | 0.488        | 0.665               | 0.726             |
| hdac2  | 0.278 | 0.451 | 0.430      | 0.416    | 0.182        | 0.403               | 0.436             |
| hdac8  | 0.538 | 0.418 | 0.380      | 0.505    | 0.769        | 0.415               | 0.653             |
| hivint | 0.452 | 0.425 | 0.409      | 0.456    | 0.299        | 0.408               | 0.474             |
| hivpr  | 0.742 | 0.778 | 0.747      | 0.724    | 0.733        | 0.772               | 0.693             |
| hivrt  | 0.616 | 0.688 | 0.697      | 0.634    | 0.665        | 0.688               | 0.609             |
| hmdh   | 0.601 | 0.771 | 0.775      | 0.841    | 0.570        | 0.775               | 0.909             |
| hs90a  | 0.727 | 0.664 | 0.624      | 0.714    | 0.692        | 0.633               | 0.734             |
| hvk4   | 0.505 | 0.395 | 0.470      | 0.632    | 0.719        | 0.491               | 0.808             |
| igf1r  | 0.338 | 0.341 | 0.349      | 0.486    | 0.518        | 0.353               | 0.547             |
| inha   | 0.345 | 0.492 | 0.505      | 0.638    | 0.516        | 0.524               | 0.718             |
| ital   | 0.578 | 0.483 | 0.450      | 0.532    | 0.473        | 0.470               | 0.477             |
| jak2   | 0.471 | 0.673 | 0.696      | 0.785    | 0.664        | 0.711               | 0.809             |
| kif11  | 0.610 | 0.678 | 0.671      | 0.763    | 0.693        | 0.714               | 0.759             |
| kit    | 0.192 | 0.368 | 0.377      | 0.408    | 0.278        | 0.387               | 0.481             |
| kith   | 0.704 | 0.618 | 0.573      | 0.478    | 0.751        | 0.558               | 0.681             |
| kpcb   | 0.691 | 0.660 | 0.684      | 0.751    | 0.715        | 0.703               | 0.801             |
| lck    | 0.246 | 0.296 | 0.406      | 0.432    | 0.246        | 0.416               | 0.446             |

| Target  |       |       |            |          | Color | Color      | Color    |
|---------|-------|-------|------------|----------|-------|------------|----------|
|         | USR   | VAMS  | Unopt ROCS | Opt ROCS | USR   | Unopt ROCS | Opt Rocs |
| lkha4   | 0.518 | 0.610 | 0.621      | 0.661    | 0.478 | 0.623      | 0.787    |
| mapk2   | 0.429 | 0.732 | 0.715      | 0.736    | 0.533 | 0.724      | 0.856    |
| mcr     | 0.562 | 0.574 | 0.490      | 0.546    | 0.788 | 0.575      | 0.663    |
| met     | 0.747 | 0.748 | 0.777      | 0.765    | 0.765 | 0.790      | 0.812    |
| mk01    | 0.423 | 0.486 | 0.561      | 0.531    | 0.489 | 0.599      | 0.729    |
| mk10    | 0.458 | 0.527 | 0.514      | 0.486    | 0.531 | 0.529      | 0.556    |
| mk14    | 0.586 | 0.559 | 0.556      | 0.590    | 0.605 | 0.555      | 0.568    |
| mmp13   | 0.513 | 0.532 | 0.493      | 0.554    | 0.670 | 0.492      | 0.687    |
| mp2k1   | 0.512 | 0.528 | 0.569      | 0.486    | 0.434 | 0.575      | 0.526    |
| nos1    | 0.321 | 0.436 | 0.412      | 0.380    | 0.361 | 0.394      | 0.378    |
| nram    | 0.815 | 0.810 | 0.755      | 0.800    | 0.493 | 0.751      | 0.865    |
| pa2ga   | 0.539 | 0.612 | 0.598      | 0.645    | 0.549 | 0.609      | 0.711    |
| parp1   | 0.585 | 0.717 | 0.704      | 0.656    | 0.637 | 0.709      | 0.712    |
| pde5a   | 0.466 | 0.588 | 0.528      | 0.611    | 0.562 | 0.538      | 0.615    |
| pgh1    | 0.468 | 0.693 | 0.731      | 0.727    | 0.604 | 0.715      | 0.635    |
| pgh2    | 0.564 | 0.738 | 0.739      | 0.806    | 0.660 | 0.735      | 0.750    |
| plk1    | 0.423 | 0.494 | 0.516      | 0.549    | 0.535 | 0.536      | 0.557    |
| pnph    | 0.690 | 0.629 | 0.656      | 0.810    | 0.729 | 0.678      | 0.918    |
| ppara   | 0.856 | 0.774 | 0.806      | 0.818    | 0.795 | 0.798      | 0.800    |
| ppard   | 0.575 | 0.546 | 0.581      | 0.617    | 0.373 | 0.597      | 0.686    |
| pparg   | 0.665 | 0.566 | 0.626      | 0.623    | 0.298 | 0.648      | 0.732    |
| prgr    | 0.628 | 0.679 | 0.678      | 0.692    | 0.604 | 0.679      | 0.704    |
| ptn1    | 0.223 | 0.322 | 0.318      | 0.327    | 0.113 | 0.303      | 0.290    |
| pur2    | 0.649 | 0.564 | 0.565      | 0.489    | 0.756 | 0.614      | 0.898    |
| pygm    | 0.454 | 0.471 | 0.504      | 0.478    | 0.576 | 0.535      | 0.461    |
| pyrd    | 0.779 | 0.867 | 0.882      | 0.899    | 0.466 | 0.853      | 0.856    |
| reni    | 0.729 | 0.677 | 0.601      | 0.603    | 0.587 | 0.599      | 0.573    |
| rock1   | 0.505 | 0.447 | 0.423      | 0.470    | 0.525 | 0.456      | 0.609    |
| rxra    | 0.464 | 0.509 | 0.438      | 0.668    | 0.349 | 0.563      | 0.900    |
| sahh    | 0.742 | 0.534 | 0.557      | 0.874    | 0.912 | 0.713      | 0.995    |
| src     | 0.560 | 0.590 | 0.600      | 0.666    | 0.518 | 0.600      | 0.585    |
| tgfr1   | 0.506 | 0.644 | 0.632      | 0.680    | 0.520 | 0.639      | 0.721    |
| thb     | 0.698 | 0.706 | 0.762      | 0.818    | 0.671 | 0.772      | 0.887    |
| thrb    | 0.641 | 0.448 | 0.400      | 0.418    | 0.573 | 0.420      | 0.516    |
| try1    | 0.726 | 0.656 | 0.588      | 0.531    | 0.723 | 0.596      | 0.574    |
| tryb1   | 0.311 | 0.373 | 0.421      | 0.399    | 0.352 | 0.454      | 0.481    |
| tysy    | 0.708 | 0.636 | 0.637      | 0.679    | 0.790 | 0.669      | 0.730    |
| urok    | 0.328 | 0.412 | 0.375      | 0.412    | 0.439 | 0.382      | 0.499    |
| vgfr2   | 0.694 | 0.637 | 0.673      | 0.715    | 0.597 | 0.682      | 0.687    |
| wee1    | 0.453 | 0.573 | 0.632      | 0.941    | 0.804 | 0.690      | 0.981    |
| xiap    | 0.675 | 0.652 | 0.537      | 0.727    | 0.848 | 0.606      | 0.923    |
| Average | 0.520 | 0.560 | 0.557      | 0.596    | 0.554 | 0.572      | 0.663    |

**Table S2:** BEDROC measures of early retrieval for various shape-based virtual screening algorithms. Calculations were performed using the CROC python package<sup>43</sup>.

| Target |       |       |            |          | Color | Color      | Color    |
|--------|-------|-------|------------|----------|-------|------------|----------|
|        | USR   | VAMS  | Unopt ROCS | Opt ROCS | USR   | Unopt ROCS | Opt Rocs |
| aa2ar  | 0.095 | 0.114 | 0.126      | 0.175    | 0.039 | 0.161      | 0.293    |
| abl1   | 0.048 | 0.092 | 0.113      | 0.158    | 0.085 | 0.146      | 0.249    |
| ace    | 0.073 | 0.137 | 0.109      | 0.097    | 0.326 | 0.151      | 0.256    |
| aces   | 0.012 | 0.012 | 0.017      | 0.052    | 0.023 | 0.026      | 0.093    |
| ada    | 0.084 | 0.102 | 0.142      | 0.204    | 0.320 | 0.203      | 0.675    |
| ada17  | 0.069 | 0.093 | 0.073      | 0.072    | 0.097 | 0.094      | 0.226    |
| adrb1  | 0.050 | 0.110 | 0.117      | 0.106    | 0.073 | 0.115      | 0.184    |
| adrb2  | 0.063 | 0.105 | 0.099      | 0.096    | 0.059 | 0.109      | 0.133    |
| akt1   | 0.031 | 0.032 | 0.029      | 0.026    | 0.051 | 0.033      | 0.069    |
| akt2   | 0.076 | 0.065 | 0.091      | 0.112    | 0.156 | 0.090      | 0.149    |
| aldr   | 0.077 | 0.205 | 0.268      | 0.245    | 0.000 | 0.310      | 0.453    |
| ampc   | 0.055 | 0.265 | 0.189      | 0.303    | 0.422 | 0.221      | 0.471    |
| andr   | 0.089 | 0.151 | 0.123      | 0.164    | 0.288 | 0.174      | 0.319    |
| aofb   | 0.045 | 0.065 | 0.072      | 0.067    | 0.061 | 0.056      | 0.054    |
| bace1  | 0.033 | 0.016 | 0.016      | 0.022    | 0.021 | 0.015      | 0.043    |
| braf   | 0.093 | 0.181 | 0.172      | 0.288    | 0.202 | 0.186      | 0.342    |
| cah2   | 0.035 | 0.052 | 0.064      | 0.057    | 0.037 | 0.052      | 0.142    |
| casp3  | 0.068 | 0.060 | 0.061      | 0.045    | 0.226 | 0.062      | 0.082    |
| cdk2   | 0.108 | 0.189 | 0.219      | 0.255    | 0.250 | 0.225      | 0.270    |
| comt   | 0.089 | 0.146 | 0.112      | 0.257    | 0.299 | 0.182      | 0.738    |
| cp2c9  | 0.041 | 0.089 | 0.068      | 0.093    | 0.059 | 0.066      | 0.077    |
| cp3a4  | 0.076 | 0.095 | 0.086      | 0.126    | 0.066 | 0.064      | 0.053    |
| csflr  | 0.155 | 0.303 | 0.285      | 0.324    | 0.111 | 0.298      | 0.336    |
| cxcr4  | 0.029 | 0.168 | 0.204      | 0.457    | 0.099 | 0.294      | 0.490    |
| def    | 0.114 | 0.240 | 0.242      | 0.393    | 0.351 | 0.279      | 0.557    |
| dhi1   | 0.069 | 0.202 | 0.177      | 0.265    | 0.066 | 0.183      | 0.269    |
| dpp4   | 0.132 | 0.163 | 0.190      | 0.172    | 0.228 | 0.234      | 0.259    |
| drd3   | 0.025 | 0.042 | 0.051      | 0.038    | 0.010 | 0.040      | 0.035    |
| dyr    | 0.045 | 0.064 | 0.054      | 0.082    | 0.387 | 0.193      | 0.474    |
| egfr   | 0.056 | 0.138 | 0.175      | 0.184    | 0.083 | 0.218      | 0.391    |
| esr1   | 0.092 | 0.259 | 0.312      | 0.353    | 0.333 | 0.352      | 0.544    |
| esr2   | 0.095 | 0.167 | 0.168      | 0.312    | 0.428 | 0.256      | 0.481    |
| fa10   | 0.107 | 0.144 | 0.141      | 0.181    | 0.137 | 0.161      | 0.323    |
| fa7    | 0.112 | 0.047 | 0.077      | 0.108    | 0.458 | 0.087      | 0.232    |
| fabp4  | 0.367 | 0.209 | 0.320      | 0.467    | 0.000 | 0.340      | 0.432    |
| fak1   | 0.052 | 0.187 | 0.290      | 0.476    | 0.143 | 0.313      | 0.864    |
| fgfr1  | 0.036 | 0.057 | 0.046      | 0.035    | 0.009 | 0.057      | 0.061    |
| fkbl1a | 0.063 | 0.106 | 0.087      | 0.124    | 0.015 | 0.075      | 0.094    |
| fnta   | 0.117 | 0.100 | 0.063      | 0.132    | 0.140 | 0.079      | 0.337    |
| fpps   | 0.314 | 0.682 | 0.657      | 0.707    | 0.178 | 0.698      | 0.923    |

| Target | USR   | VAMS  | Unopt ROCS | Opt ROCS | Color<br>USR | Color<br>Unopt ROCS | Color<br>Opt Rocs |
|--------|-------|-------|------------|----------|--------------|---------------------|-------------------|
| gcr    | 0.090 | 0.127 | 0.092      | 0.161    | 0.142        | 0.097               | 0.171             |
| glcm   | 0.051 | 0.063 | 0.098      | 0.086    | 0.140        | 0.117               | 0.173             |
| gria2  | 0.134 | 0.094 | 0.186      | 0.364    | 0.152        | 0.179               | 0.409             |
| grik1  | 0.059 | 0.101 | 0.158      | 0.148    | 0.036        | 0.163               | 0.245             |
| hdac2  | 0.035 | 0.110 | 0.111      | 0.081    | 0.038        | 0.092               | 0.100             |
| hdac8  | 0.058 | 0.070 | 0.058      | 0.123    | 0.482        | 0.079               | 0.321             |
| hivint | 0.028 | 0.050 | 0.062      | 0.107    | 0.000        | 0.046               | 0.072             |
| hivpr  | 0.317 | 0.274 | 0.257      | 0.210    | 0.173        | 0.300               | 0.175             |
| hivrt  | 0.139 | 0.147 | 0.176      | 0.111    | 0.160        | 0.164               | 0.146             |
| hmdh   | 0.255 | 0.380 | 0.380      | 0.560    | 0.271        | 0.391               | 0.730             |
| hs90a  | 0.118 | 0.206 | 0.173      | 0.266    | 0.165        | 0.191               | 0.453             |
| hvk4   | 0.102 | 0.248 | 0.272      | 0.398    | 0.417        | 0.290               | 0.523             |
| igflr  | 0.042 | 0.040 | 0.063      | 0.135    | 0.141        | 0.089               | 0.196             |
| inha   | 0.026 | 0.116 | 0.124      | 0.253    | 0.155        | 0.156               | 0.340             |
| ital   | 0.077 | 0.177 | 0.160      | 0.175    | 0.007        | 0.158               | 0.166             |
| jak2   | 0.039 | 0.217 | 0.216      | 0.345    | 0.098        | 0.237               | 0.529             |
| kif11  | 0.107 | 0.172 | 0.172      | 0.363    | 0.245        | 0.299               | 0.461             |
| kit    | 0.008 | 0.056 | 0.046      | 0.044    | 0.028        | 0.043               | 0.066             |
| kith   | 0.130 | 0.141 | 0.157      | 0.203    | 0.202        | 0.198               | 0.383             |
| kpcb   | 0.201 | 0.132 | 0.232      | 0.410    | 0.237        | 0.264               | 0.686             |
| lck    | 0.013 | 0.032 | 0.062      | 0.115    | 0.008        | 0.061               | 0.094             |
| lkha4  | 0.103 | 0.217 | 0.239      | 0.290    | 0.092        | 0.277               | 0.453             |
| mapk2  | 0.075 | 0.293 | 0.316      | 0.394    | 0.219        | 0.332               | 0.600             |
| mcr    | 0.087 | 0.111 | 0.045      | 0.107    | 0.287        | 0.087               | 0.237             |
| met    | 0.349 | 0.394 | 0.369      | 0.392    | 0.481        | 0.376               | 0.461             |
| mk01   | 0.067 | 0.152 | 0.164      | 0.180    | 0.093        | 0.165               | 0.338             |
| mk10   | 0.031 | 0.078 | 0.112      | 0.092    | 0.057        | 0.135               | 0.128             |
| mk14   | 0.163 | 0.144 | 0.141      | 0.184    | 0.110        | 0.137               | 0.183             |
| mmp13  | 0.077 | 0.145 | 0.108      | 0.153    | 0.262        | 0.130               | 0.349             |
| mp2k1  | 0.133 | 0.161 | 0.105      | 0.134    | 0.088        | 0.161               | 0.229             |
| nos1   | 0.040 | 0.108 | 0.096      | 0.059    | 0.032        | 0.095               | 0.054             |
| nram   | 0.303 | 0.305 | 0.238      | 0.321    | 0.028        | 0.262               | 0.362             |
| pa2ga  | 0.044 | 0.138 | 0.119      | 0.141    | 0.180        | 0.166               | 0.405             |
| parp1  | 0.163 | 0.339 | 0.305      | 0.308    | 0.166        | 0.316               | 0.403             |
| pde5a  | 0.040 | 0.099 | 0.119      | 0.181    | 0.112        | 0.119               | 0.233             |
| pgh1   | 0.041 | 0.176 | 0.221      | 0.200    | 0.109        | 0.204               | 0.159             |
| pgh2   | 0.114 | 0.367 | 0.345      | 0.474    | 0.194        | 0.382               | 0.515             |
| plk1   | 0.010 | 0.018 | 0.035      | 0.044    | 0.121        | 0.060               | 0.064             |
| pnph   | 0.133 | 0.188 | 0.256      | 0.561    | 0.273        | 0.333               | 0.729             |
| ppara  | 0.362 | 0.289 | 0.342      | 0.336    | 0.181        | 0.341               | 0.381             |
| ppard  | 0.102 | 0.174 | 0.124      | 0.129    | 0.023        | 0.169               | 0.301             |
| pparg  | 0.227 | 0.139 | 0.134      | 0.182    | 0.006        | 0.186               | 0.340             |
| prgr   | 0.143 | 0.168 | 0.170      | 0.122    | 0.121        | 0.221               | 0.182             |

| Target  |       |       |            |          | Color | Color      | Color    |
|---------|-------|-------|------------|----------|-------|------------|----------|
|         | USR   | VAMS  | Unopt ROCS | Opt ROCS | USR   | Unopt ROCS | Opt Rocs |
| ptn1    | 0.029 | 0.055 | 0.056      | 0.053    | 0.012 | 0.056      | 0.054    |
| pur2    | 0.288 | 0.244 | 0.240      | 0.271    | 0.472 | 0.327      | 0.621    |
| pygm    | 0.058 | 0.018 | 0.017      | 0.030    | 0.095 | 0.025      | 0.007    |
| pyrd    | 0.314 | 0.567 | 0.589      | 0.640    | 0.014 | 0.566      | 0.623    |
| reni    | 0.167 | 0.186 | 0.187      | 0.229    | 0.239 | 0.224      | 0.310    |
| rock1   | 0.038 | 0.068 | 0.046      | 0.034    | 0.042 | 0.109      | 0.074    |
| rxra    | 0.036 | 0.105 | 0.038      | 0.214    | 0.039 | 0.196      | 0.679    |
| sahh    | 0.329 | 0.159 | 0.202      | 0.630    | 0.746 | 0.321      | 0.983    |
| src     | 0.050 | 0.062 | 0.069      | 0.112    | 0.055 | 0.079      | 0.120    |
| tgfr1   | 0.168 | 0.375 | 0.366      | 0.416    | 0.179 | 0.329      | 0.384    |
| thb     | 0.139 | 0.359 | 0.426      | 0.558    | 0.092 | 0.443      | 0.697    |
| thrb    | 0.079 | 0.031 | 0.035      | 0.035    | 0.083 | 0.033      | 0.076    |
| try1    | 0.159 | 0.157 | 0.128      | 0.085    | 0.286 | 0.126      | 0.117    |
| tryb1   | 0.030 | 0.061 | 0.066      | 0.026    | 0.058 | 0.110      | 0.135    |
| tysy    | 0.289 | 0.217 | 0.155      | 0.138    | 0.484 | 0.254      | 0.264    |
| urok    | 0.059 | 0.052 | 0.062      | 0.113    | 0.151 | 0.058      | 0.207    |
| vgfr2   | 0.122 | 0.094 | 0.110      | 0.152    | 0.051 | 0.121      | 0.201    |
| wee1    | 0.068 | 0.376 | 0.380      | 0.640    | 0.325 | 0.411      | 0.959    |
| xiap    | 0.113 | 0.065 | 0.062      | 0.183    | 0.602 | 0.136      | 0.709    |
| Average | 0.106 | 0.157 | 0.162      | 0.216    | 0.166 | 0.187      | 0.326    |

**Table S3:** Corrected partial AUCs calculated at a false positive rate of 10% for various shape-based virtual screening algorithms. A value of 0.5 indicates random performance while a value of one indicates perfect classification for the initial fraction of the dataset that yields a 10% false positive rate. Calculations were performed using the pROC R library<sup>40</sup>.

| Target |       |       |            |          | Color | Color      | Color    |
|--------|-------|-------|------------|----------|-------|------------|----------|
|        | USR   | VAMS  | Unopt ROCS | Opt ROCS | USR   | Unopt ROCS | Opt Rocs |
| aa2ar  | 0.520 | 0.528 | 0.534      | 0.559    | 0.491 | 0.551      | 0.615    |
| abl1   | 0.496 | 0.520 | 0.528      | 0.553    | 0.515 | 0.544      | 0.594    |
| ace    | 0.503 | 0.538 | 0.523      | 0.520    | 0.639 | 0.545      | 0.597    |
| aces   | 0.478 | 0.479 | 0.481      | 0.499    | 0.483 | 0.486      | 0.514    |
| ada    | 0.511 | 0.518 | 0.546      | 0.564    | 0.632 | 0.575      | 0.824    |
| ada17  | 0.506 | 0.520 | 0.509      | 0.507    | 0.520 | 0.520      | 0.587    |
| adrb1  | 0.497 | 0.527 | 0.528      | 0.525    | 0.509 | 0.528      | 0.564    |
| adrb2  | 0.505 | 0.525 | 0.520      | 0.520    | 0.501 | 0.524      | 0.536    |
| akt1   | 0.489 | 0.487 | 0.487      | 0.485    | 0.498 | 0.489      | 0.505    |
| akt2   | 0.508 | 0.502 | 0.516      | 0.526    | 0.551 | 0.516      | 0.543    |
| aldr   | 0.510 | 0.571 | 0.606      | 0.595    | 0.474 | 0.621      | 0.695    |
| ampc   | 0.498 | 0.601 | 0.563      | 0.619    | 0.688 | 0.578      | 0.711    |
| andr   | 0.514 | 0.545 | 0.528      | 0.551    | 0.616 | 0.554      | 0.633    |
| aofb   | 0.495 | 0.504 | 0.507      | 0.505    | 0.502 | 0.499      | 0.498    |
| bace1  | 0.488 | 0.481 | 0.481      | 0.484    | 0.481 | 0.481      | 0.495    |
| braf   | 0.517 | 0.557 | 0.552      | 0.616    | 0.567 | 0.559      | 0.636    |
| cah2   | 0.488 | 0.499 | 0.505      | 0.501    | 0.491 | 0.498      | 0.545    |
| casp3  | 0.504 | 0.503 | 0.503      | 0.495    | 0.581 | 0.504      | 0.514    |
| cdk2   | 0.526 | 0.568 | 0.584      | 0.602    | 0.602 | 0.588      | 0.605    |
| comt   | 0.513 | 0.555 | 0.534      | 0.595    | 0.629 | 0.570      | 0.867    |
| cp2c9  | 0.492 | 0.520 | 0.505      | 0.517    | 0.502 | 0.502      | 0.510    |
| cp3a4  | 0.511 | 0.520 | 0.517      | 0.536    | 0.504 | 0.504      | 0.499    |
| csf1r  | 0.554 | 0.621 | 0.612      | 0.631    | 0.529 | 0.619      | 0.633    |
| cxcr4  | 0.484 | 0.555 | 0.576      | 0.723    | 0.528 | 0.622      | 0.731    |
| def    | 0.526 | 0.593 | 0.597      | 0.662    | 0.644 | 0.609      | 0.761    |
| dhi1   | 0.504 | 0.574 | 0.562      | 0.604    | 0.502 | 0.564      | 0.607    |
| dpp4   | 0.539 | 0.553 | 0.572      | 0.559    | 0.586 | 0.590      | 0.603    |
| drd3   | 0.485 | 0.492 | 0.497      | 0.490    | 0.479 | 0.493      | 0.489    |
| dyr    | 0.495 | 0.505 | 0.498      | 0.512    | 0.669 | 0.567      | 0.710    |
| egfr   | 0.499 | 0.542 | 0.560      | 0.566    | 0.512 | 0.583      | 0.675    |
| esr1   | 0.518 | 0.599 | 0.626      | 0.646    | 0.637 | 0.643      | 0.743    |
| esr2   | 0.520 | 0.551 | 0.554      | 0.625    | 0.691 | 0.597      | 0.714    |
| fa10   | 0.521 | 0.540 | 0.539      | 0.561    | 0.538 | 0.547      | 0.633    |
| fa7    | 0.525 | 0.494 | 0.509      | 0.520    | 0.706 | 0.511      | 0.584    |
| fabp4  | 0.655 | 0.569 | 0.627      | 0.700    | 0.474 | 0.635      | 0.681    |
| fak1   | 0.498 | 0.561 | 0.613      | 0.709    | 0.540 | 0.625      | 0.921    |
| fgfr1  | 0.490 | 0.501 | 0.493      | 0.490    | 0.477 | 0.501      | 0.499    |

| Target | USR   | VAMS  | Unopt ROCS | Opt ROCS | Color<br>USR | Color<br>Unopt ROCS | Color<br>Opt Rocs |
|--------|-------|-------|------------|----------|--------------|---------------------|-------------------|
| fkbl1a | 0.501 | 0.523 | 0.515      | 0.534    | 0.479        | 0.506               | 0.512             |
| fnta   | 0.532 | 0.520 | 0.504      | 0.540    | 0.548        | 0.511               | 0.646             |
| fpps   | 0.646 | 0.838 | 0.824      | 0.846    | 0.570        | 0.843               | 0.964             |
| gcr    | 0.517 | 0.535 | 0.517      | 0.548    | 0.539        | 0.521               | 0.552             |
| glcm   | 0.500 | 0.507 | 0.525      | 0.521    | 0.538        | 0.531               | 0.558             |
| gria2  | 0.540 | 0.518 | 0.565      | 0.654    | 0.548        | 0.562               | 0.675             |
| grik1  | 0.501 | 0.519 | 0.553      | 0.550    | 0.485        | 0.550               | 0.600             |
| hdac2  | 0.491 | 0.525 | 0.526      | 0.512    | 0.490        | 0.518               | 0.521             |
| hdac8  | 0.499 | 0.504 | 0.502      | 0.533    | 0.722        | 0.510               | 0.634             |
| hivint | 0.484 | 0.498 | 0.501      | 0.533    | 0.474        | 0.493               | 0.508             |
| hivpr  | 0.635 | 0.612 | 0.604      | 0.584    | 0.559        | 0.628               | 0.558             |
| hivrt  | 0.546 | 0.540 | 0.561      | 0.520    | 0.552        | 0.550               | 0.541             |
| hmdh   | 0.598 | 0.662 | 0.663      | 0.759    | 0.606        | 0.666               | 0.845             |
| hs90a  | 0.522 | 0.580 | 0.562      | 0.604    | 0.555        | 0.565               | 0.705             |
| hvk4   | 0.517 | 0.590 | 0.599      | 0.661    | 0.685        | 0.610               | 0.728             |
| igflr  | 0.493 | 0.492 | 0.503      | 0.539    | 0.545        | 0.515               | 0.562             |
| inha   | 0.486 | 0.523 | 0.523      | 0.602    | 0.545        | 0.538               | 0.635             |
| ital   | 0.511 | 0.557 | 0.547      | 0.551    | 0.474        | 0.545               | 0.550             |
| jak2   | 0.490 | 0.581 | 0.579      | 0.657    | 0.518        | 0.593               | 0.742             |
| kif11  | 0.528 | 0.557 | 0.552      | 0.666    | 0.599        | 0.625               | 0.715             |
| kit    | 0.477 | 0.500 | 0.494      | 0.494    | 0.486        | 0.492               | 0.504             |
| kith   | 0.528 | 0.537 | 0.543      | 0.569    | 0.568        | 0.563               | 0.663             |
| kpcb   | 0.580 | 0.535 | 0.587      | 0.673    | 0.592        | 0.601               | 0.821             |
| lck    | 0.479 | 0.488 | 0.501      | 0.530    | 0.476        | 0.502               | 0.518             |
| lkha4  | 0.527 | 0.579 | 0.594      | 0.617    | 0.516        | 0.615               | 0.704             |
| mapk2  | 0.507 | 0.615 | 0.630      | 0.672    | 0.579        | 0.639               | 0.775             |
| mcr    | 0.516 | 0.522 | 0.492      | 0.521    | 0.613        | 0.508               | 0.586             |
| met    | 0.656 | 0.680 | 0.673      | 0.687    | 0.729        | 0.679               | 0.701             |
| mk01   | 0.505 | 0.547 | 0.552      | 0.566    | 0.513        | 0.556               | 0.629             |
| mk10   | 0.487 | 0.512 | 0.525      | 0.516    | 0.497        | 0.539               | 0.533             |
| mk14   | 0.557 | 0.546 | 0.542      | 0.566    | 0.527        | 0.540               | 0.564             |
| mmp13  | 0.509 | 0.545 | 0.525      | 0.547    | 0.607        | 0.536               | 0.648             |
| mp2k1  | 0.537 | 0.554 | 0.525      | 0.541    | 0.520        | 0.551               | 0.587             |
| nos1   | 0.493 | 0.528 | 0.523      | 0.504    | 0.490        | 0.526               | 0.500             |
| nram   | 0.622 | 0.635 | 0.592      | 0.648    | 0.485        | 0.605               | 0.659             |
| pa2ga  | 0.489 | 0.538 | 0.528      | 0.538    | 0.561        | 0.554               | 0.679             |
| parp1  | 0.552 | 0.643 | 0.625      | 0.625    | 0.555        | 0.631               | 0.672             |
| pde5a  | 0.491 | 0.520 | 0.532      | 0.561    | 0.526        | 0.530               | 0.582             |
| pgh1   | 0.492 | 0.561 | 0.589      | 0.570    | 0.529        | 0.578               | 0.549             |
| pgh2   | 0.527 | 0.656 | 0.644      | 0.717    | 0.562        | 0.661               | 0.729             |
| plk1   | 0.478 | 0.480 | 0.486      | 0.490    | 0.536        | 0.500               | 0.501             |
| pnph   | 0.539 | 0.566 | 0.604      | 0.758    | 0.606        | 0.646               | 0.855             |
| ppara  | 0.661 | 0.619 | 0.650      | 0.649    | 0.562        | 0.649               | 0.663             |



| Target  |       |       |            |          | Color | Color      | Color    |
|---------|-------|-------|------------|----------|-------|------------|----------|
|         | USR   | VAMS  | Unopt ROCS | Opt ROCS | USR   | Unopt ROCS | Opt Rocs |
| ppard   | 0.520 | 0.560 | 0.532      | 0.532    | 0.483 | 0.555      | 0.632    |
| pparg   | 0.588 | 0.541 | 0.535      | 0.560    | 0.476 | 0.563      | 0.640    |
| prgr    | 0.538 | 0.553 | 0.559      | 0.528    | 0.527 | 0.586      | 0.559    |
| ptn1    | 0.489 | 0.498 | 0.499      | 0.498    | 0.480 | 0.499      | 0.499    |
| pur2    | 0.621 | 0.587 | 0.583      | 0.602    | 0.709 | 0.637      | 0.795    |
| pygm    | 0.503 | 0.477 | 0.481      | 0.488    | 0.515 | 0.487      | 0.476    |
| pyrd    | 0.619 | 0.756 | 0.775      | 0.801    | 0.477 | 0.748      | 0.780    |
| reni    | 0.555 | 0.563 | 0.566      | 0.588    | 0.591 | 0.580      | 0.624    |
| rock1   | 0.490 | 0.507 | 0.495      | 0.487    | 0.489 | 0.533      | 0.503    |
| rxra    | 0.488 | 0.521 | 0.489      | 0.576    | 0.490 | 0.567      | 0.833    |
| sahh    | 0.638 | 0.551 | 0.568      | 0.797    | 0.864 | 0.623      | 0.990    |
| src     | 0.492 | 0.499 | 0.503      | 0.527    | 0.498 | 0.508      | 0.532    |
| tgfr1   | 0.554 | 0.663 | 0.658      | 0.679    | 0.557 | 0.641      | 0.670    |
| thb     | 0.538 | 0.655 | 0.690      | 0.761    | 0.511 | 0.700      | 0.838    |
| thrb    | 0.506 | 0.485 | 0.489      | 0.489    | 0.512 | 0.487      | 0.507    |
| try1    | 0.547 | 0.550 | 0.535      | 0.513    | 0.614 | 0.535      | 0.529    |
| tryb1   | 0.487 | 0.503 | 0.505      | 0.482    | 0.500 | 0.525      | 0.538    |
| tysy    | 0.628 | 0.585 | 0.555      | 0.537    | 0.723 | 0.607      | 0.607    |
| urok    | 0.500 | 0.497 | 0.502      | 0.526    | 0.548 | 0.499      | 0.576    |
| vgfr2   | 0.530 | 0.517 | 0.524      | 0.545    | 0.494 | 0.528      | 0.572    |
| weel    | 0.505 | 0.653 | 0.654      | 0.796    | 0.646 | 0.675      | 0.977    |
| xiap    | 0.523 | 0.498 | 0.500      | 0.560    | 0.778 | 0.539      | 0.849    |
| Average | 0.524 | 0.550 | 0.553      | 0.581    | 0.555 | 0.565      | 0.637    |

**Table S4:** Screening results for minimum/maximum shape constraints. Both ligand only and ligand-receptor shape constraints were considered with shrinking/growing gap sizes of 1, 1.5, and 2Å resulting in a total of 18 searches for every DUD-E target. For each target, only the result with the highest F1 score is shown. The  $p$ -value of enrichment is computed using the hypergeometric distribution and is shown in bold if it is statistically significant after the Bonferroni correction for multiple comparisons ( $p < 0.05/18$ ). LO: Ligand only shape constraint. LR: Ligand-receptor shape constraint. TP: True Positives. FP: False Positives. FN: False Negatives. TN: True Negatives. EF: Enrichment Factor.

| Target | Constraint | Shrink | Grow | TP  | FP    | FN  | TN    | EF     | $p$                |
|--------|------------|--------|------|-----|-------|-----|-------|--------|--------------------|
| aa2ar  | LR         | 1.0    | 1.5  | 31  | 735   | 451 | 30758 | 2.685  | <b>2.72543e-07</b> |
| abl1   | LR         | 1.0    | 2.0  | 11  | 299   | 171 | 10447 | 2.131  | 0.00569147         |
| ace    | LR         | 2.0    | 2.0  | 6   | 361   | 276 | 16497 | 0.994  | 0.399905           |
| aces   | LR         | 1.0    | 2.0  | 19  | 1354  | 434 | 24880 | 0.815  | 0.790005           |
| ada    | LR         | 1.0    | 2.0  | 4   | 16    | 89  | 5433  | 11.918 | <b>1.5175e-05</b>  |
| ada17  | LR         | 2.0    | 2.0  | 194 | 9594  | 338 | 26212 | 1.354  | <b>4.98664e-07</b> |
| adrb1  | LR         | 2.0    | 1.5  | 23  | 558   | 224 | 15284 | 2.579  | <b>1.0897e-05</b>  |
| adrb2  | LR         | 2.0    | 1.5  | 8   | 131   | 223 | 14861 | 3.793  | <b>0.000271003</b> |
| akt1   | LR         | 2.0    | 1.0  | 4   | 9     | 289 | 16417 | 17.557 | <b>1.83249e-06</b> |
| akt2   | LR         | 2.0    | 1.5  | 6   | 58    | 111 | 6835  | 5.617  | <b>8.52755e-05</b> |
| aldr   | LR         | 2.0    | 2.0  | 92  | 4473  | 67  | 4520  | 1.160  | 0.0172504          |
| ampc   | LR         | 1.0    | 1.5  | 6   | 33    | 42  | 2814  | 9.279  | <b>2.25987e-06</b> |
| andr   | LR         | 1.0    | 1.0  | 7   | 0     | 262 | 14341 | 54.312 | <b>0</b>           |
| aofb   | LR         | 1.0    | 1.5  | 16  | 702   | 106 | 6195  | 1.282  | 0.115413           |
| bace1  | LR         | 2.0    | 2.0  | 61  | 6303  | 222 | 11777 | 0.622  | 0.999999           |
| braf   | LR         | 1.0    | 1.5  | 17  | 38    | 135 | 9906  | 20.530 | <b>0</b>           |
| cah2   | LR         | 1.0    | 1.5  | 4   | 49    | 488 | 31082 | 4.851  | <b>0.0013865</b>   |
| casp3  | LR         | 2.0    | 1.5  | 34  | 1544  | 165 | 9147  | 1.179  | 0.126063           |
| cdk2   | LR         | 2.0    | 2.0  | 58  | 1087  | 416 | 26742 | 3.025  | <b>1.95399e-14</b> |
| comt   | LR         | 1.0    | 1.0  | 1   | 11    | 40  | 3837  | 7.904  | 0.00669518         |
| cp2c9  | LR         | 1.0    | 2.0  | 3   | 17    | 117 | 7426  | 9.454  | <b>0.000239934</b> |
| cp3a4  | LR         | 1.0    | 0.5  | 0   | 0     | 170 | 11793 | 0.000  | <b>0</b>           |
| csf1r  | LR         | 1.0    | 1.5  | 24  | 9     | 142 | 12135 | 53.932 | <b>0</b>           |
| cxcr4  | LR         | 2.0    | 2.0  | 12  | 336   | 28  | 3070  | 2.971  | <b>8.66808e-05</b> |
| def    | LR         | 1.0    | 2.0  | 8   | 46    | 94  | 5650  | 8.421  | <b>3.11867e-07</b> |
| dhi1   | LR         | 2.0    | 2.0  | 90  | 2955  | 239 | 16382 | 1.767  | <b>9.47984e-09</b> |
| dpp4   | LR         | 2.0    | 1.5  | 51  | 776   | 482 | 40137 | 4.795  | <b>0</b>           |
| drd3   | LR         | 2.0    | 2.0  | 119 | 11871 | 361 | 22149 | 0.713  | 0.999999           |
| dyr    | LR         | 2.0    | 2.0  | 110 | 10752 | 121 | 6418  | 0.763  | 0.999997           |
| egfr   | LR         | 2.0    | 2.0  | 129 | 4506  | 413 | 30515 | 1.826  | <b>2.14273e-12</b> |
| esr1   | LR         | 2.0    | 1.5  | 20  | 13    | 363 | 20649 | 33.302 | <b>0</b>           |

| Target | Constraint | Shrink | Grow | TP  | FP   | FN  | TN    | EF     | $p$                |
|--------|------------|--------|------|-----|------|-----|-------|--------|--------------------|
| esr2   | LR         | 2.0    | 1.5  | 23  | 81   | 344 | 20101 | 12.383 | <b>0</b>           |
| fa10   | LR         | 2.0    | 2.0  | 207 | 7608 | 330 | 20638 | 1.420  | <b>2.63255e-09</b> |
| fa7    | LR         | 1.0    | 0.5  | 0   | 0    | 114 | 6245  | 0.000  | <b>0</b>           |
| fabp4  | LR         | 2.0    | 2.0  | 3   | 79   | 44  | 2670  | 2.176  | 0.047167           |
| fak1   | LR         | 2.0    | 1.5  | 4   | 7    | 96  | 5343  | 19.818 | <b>7.96567e-07</b> |
| fgfr1  | LR         | 2.0    | 2.0  | 28  | 1499 | 111 | 7192  | 1.165  | 0.156432           |
| fkbl1a | LR         | 2.0    | 2.0  | 14  | 421  | 97  | 5379  | 1.714  | 0.0153565          |
| fnta   | LR         | 2.0    | 2.0  | 19  | 1322 | 573 | 50090 | 1.245  | 0.135909           |
| fpps   | LR         | 1.0    | 1.0  | 12  | 4    | 73  | 8819  | 78.600 | <b>0</b>           |
| gcr    | LR         | 2.0    | 2.0  | 55  | 3326 | 203 | 11657 | 0.961  | 0.598412           |
| glcm   | LR         | 1.0    | 1.5  | 4   | 27   | 50  | 3772  | 9.207  | <b>5.7709e-05</b>  |
| gria2  | LR         | 1.0    | 2.0  | 9   | 156  | 149 | 11675 | 4.139  | <b>6.45237e-05</b> |
| grik1  | LR         | 2.0    | 1.5  | 11  | 143  | 90  | 6404  | 4.702  | <b>3.13483e-06</b> |
| hdac2  | LR         | 2.0    | 2.0  | 31  | 509  | 154 | 9791  | 3.254  | <b>1.16764e-09</b> |
| hdac8  | LR         | 2.0    | 2.0  | 12  | 305  | 158 | 10143 | 2.364  | <b>0.00173738</b>  |
| hivint | LR         | 2.0    | 1.5  | 6   | 288  | 94  | 6357  | 1.377  | 0.145247           |
| hivpr  | LR         | 2.0    | 2.0  | 68  | 1390 | 468 | 34296 | 3.152  | <b>0</b>           |
| hivrt  | LR         | 2.0    | 2.0  | 176 | 3913 | 162 | 14962 | 2.447  | <b>0</b>           |
| hmdh   | LR         | 2.0    | 2.0  | 99  | 1913 | 71  | 6830  | 2.580  | <b>0</b>           |
| hs90a  | LR         | 2.0    | 1.0  | 4   | 4    | 84  | 4844  | 28.045 | <b>8.6296e-08</b>  |
| hvk4   | LR         | 2.0    | 2.0  | 18  | 51   | 74  | 4647  | 13.582 | <b>0</b>           |
| igf1r  | LR         | 2.0    | 2.0  | 73  | 7020 | 75  | 2271  | 0.656  | 1                  |
| inha   | LR         | 2.0    | 1.0  | 3   | 0    | 40  | 2300  | 54.488 | <b>0</b>           |
| ital   | LR         | 2.0    | 2.0  | 20  | 1089 | 118 | 7396  | 1.127  | 0.235465           |
| jak2   | LR         | 1.0    | 2.0  | 43  | 1742 | 64  | 4752  | 1.486  | <b>0.0010306</b>   |
| kif11  | LR         | 2.0    | 2.0  | 71  | 2523 | 45  | 4326  | 1.643  | <b>4.04692e-08</b> |
| kit    | LR         | 2.0    | 2.0  | 5   | 95   | 161 | 10352 | 3.197  | 0.00475264         |
| kith   | LR         | 2.0    | 1.5  | 3   | 16   | 54  | 2834  | 8.053  | <b>0.000413717</b> |
| kpcb   | LR         | 2.0    | 2.0  | 44  | 1753 | 90  | 6928  | 1.611  | <b>0.000223287</b> |
| lck    | LR         | 2.0    | 2.0  | 15  | 1125 | 405 | 26249 | 0.871  | 0.654434           |
| lkha4  | LR         | 2.0    | 2.0  | 37  | 136  | 134 | 9313  | 12.032 | <b>0</b>           |
| mapk2  | LR         | 1.0    | 1.5  | 11  | 33   | 90  | 6114  | 15.465 | <b>2.24865e-12</b> |
| mcr    | LR         | 1.0    | 1.5  | 2   | 4    | 92  | 5142  | 18.582 | <b>0.000107549</b> |
| met    | LR         | 2.0    | 2.0  | 14  | 137  | 152 | 11102 | 6.370  | <b>4.80784e-09</b> |
| mk01   | LR         | 2.0    | 1.0  | 4   | 60   | 75  | 4488  | 3.661  | 0.00443472         |
| mk10   | LR         | 2.0    | 2.0  | 3   | 106  | 101 | 6492  | 1.774  | 0.0887752          |
| mk14   | LR         | 2.0    | 2.0  | 66  | 3330 | 512 | 32479 | 1.223  | 0.0382502          |
| mmp13  | LR         | 2.0    | 2.0  | 87  | 2061 | 485 | 35064 | 2.669  | <b>0</b>           |
| mp2k1  | LR         | 2.0    | 2.0  | 34  | 1197 | 87  | 6949  | 1.887  | <b>5.0929e-05</b>  |
| nos1   | LR         | 1.0    | 2.0  | 7   | 162  | 93  | 7888  | 3.376  | <b>0.00106647</b>  |
| nram   | LR         | 2.0    | 1.5  | 6   | 104  | 92  | 6095  | 3.505  | <b>0.00153523</b>  |
| pa2ga  | LR         | 2.0    | 2.0  | 7   | 278  | 92  | 4869  | 1.302  | 0.168349           |
| parp1  | LR         | 1.0    | 1.5  | 63  | 245  | 445 | 29786 | 12.296 | <b>0</b>           |
| pde5a  | LR         | 2.0    | 2.0  | 82  | 3673 | 316 | 23845 | 1.532  | <b>2.67242e-05</b> |

| Target | Constraint | Shrink | Grow | TP  | FP    | FN  | TN    | EF     | $p$                |
|--------|------------|--------|------|-----|-------|-----|-------|--------|--------------------|
| pgh1   | LR         | 1.0    | 2.0  | 29  | 894   | 166 | 9901  | 1.771  | <b>0.000842881</b> |
| pgh2   | LR         | 2.0    | 1.5  | 70  | 529   | 365 | 22603 | 6.331  | <b>0</b>           |
| plk1   | LR         | 2.0    | 2.0  | 47  | 3307  | 60  | 3490  | 0.904  | 0.80872            |
| pnph   | LR         | 2.0    | 1.5  | 10  | 218   | 93  | 6732  | 3.003  | <b>0.000459765</b> |
| ppara  | LR         | 2.0    | 2.0  | 138 | 1726  | 235 | 17632 | 3.916  | <b>0</b>           |
| ppard  | LR         | 2.0    | 2.0  | 34  | 583   | 206 | 11641 | 2.862  | <b>8.0168e-09</b>  |
| pparg  | LR         | 2.0    | 2.0  | 29  | 917   | 455 | 24338 | 1.630  | 0.00397403         |
| prgr   | LR         | 2.0    | 2.0  | 93  | 3902  | 200 | 11739 | 1.266  | 0.00384502         |
| ptn1   | LR         | 2.0    | 1.0  | 6   | 233   | 124 | 7010  | 1.424  | 0.128874           |
| pur2   | LR         | 2.0    | 2.0  | 3   | 66    | 47  | 2628  | 2.386  | 0.0353888          |
| pygm   | LR         | 2.0    | 2.0  | 62  | 3088  | 15  | 851   | 1.027  | 0.283901           |
| pyrd   | LR         | 2.0    | 1.0  | 24  | 3     | 87  | 6441  | 52.492 | <b>0</b>           |
| reni   | LR         | 2.0    | 2.0  | 21  | 603   | 83  | 6352  | 2.284  | <b>8.46454e-05</b> |
| rock1  | LR         | 2.0    | 1.5  | 18  | 969   | 82  | 5328  | 1.167  | 0.193313           |
| rxra   | LR         | 2.0    | 2.0  | 58  | 3513  | 73  | 3420  | 0.876  | 0.913524           |
| sahh   | LR         | 2.0    | 1.0  | 8   | 34    | 55  | 3416  | 10.621 | <b>2.99202e-08</b> |
| src    | LR         | 2.0    | 2.0  | 123 | 7195  | 401 | 27260 | 1.122  | 0.068177           |
| tgfr1  | LR         | 1.0    | 1.5  | 28  | 63    | 105 | 8434  | 19.965 | <b>0</b>           |
| thb    | LR         | 2.0    | 1.5  | 27  | 67    | 76  | 7372  | 21.032 | <b>0</b>           |
| thrb   | LR         | 2.0    | 2.0  | 222 | 15840 | 239 | 11105 | 0.822  | 0.999997           |
| try1   | LR         | 2.0    | 2.0  | 114 | 5806  | 335 | 20108 | 1.131  | 0.0610022          |
| tryb1  | LR         | 2.0    | 2.0  | 14  | 920   | 134 | 6723  | 0.789  | 0.793576           |
| tysy   | LR         | 2.0    | 2.0  | 42  | 1113  | 67  | 5624  | 2.284  | <b>1.35082e-08</b> |
| urok   | LR         | 2.0    | 2.0  | 4   | 126   | 158 | 9715  | 1.900  | 0.059886           |
| vgfr2  | LR         | 2.0    | 2.0  | 141 | 6110  | 268 | 18816 | 1.397  | <b>2.95124e-06</b> |
| weel   | LR         | 2.0    | 1.5  | 25  | 4     | 77  | 6145  | 52.831 | <b>0</b>           |
| xiap   | LR         | 2.0    | 2.0  | 5   | 148   | 95  | 4997  | 1.714  | 0.0709458          |

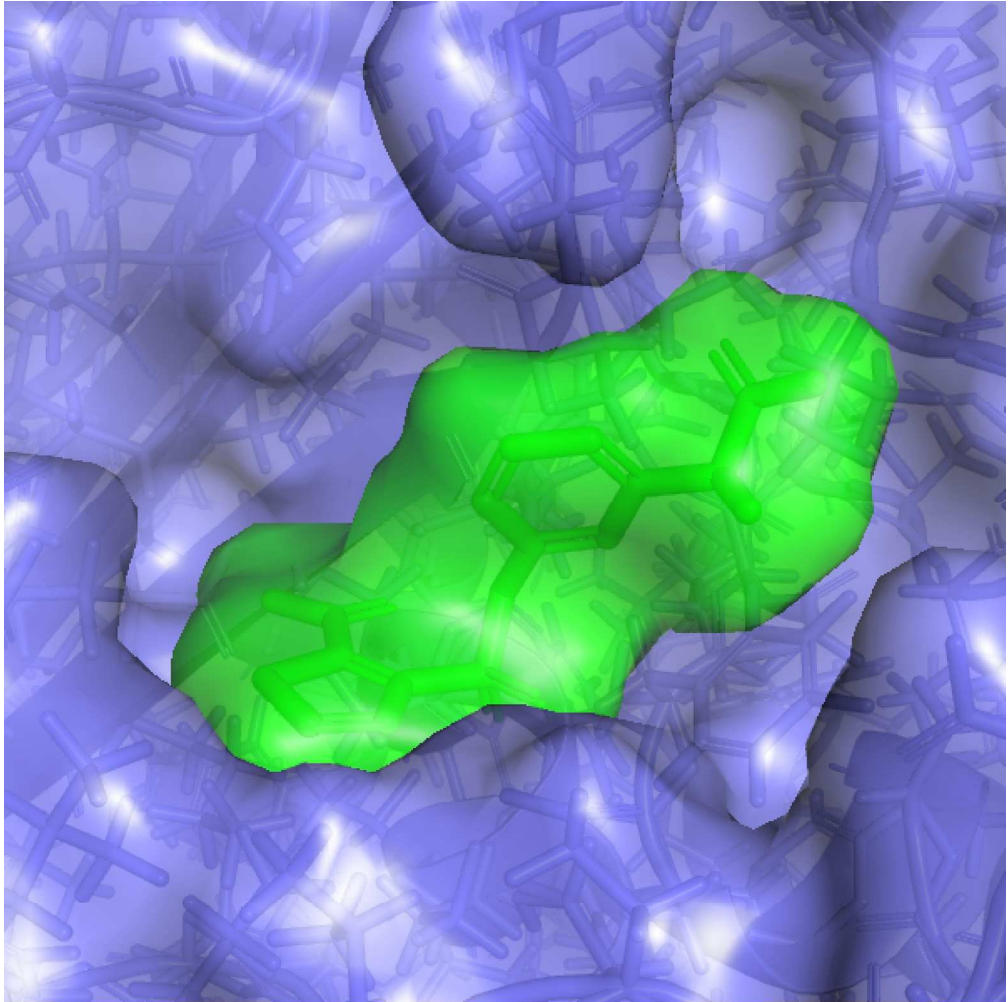

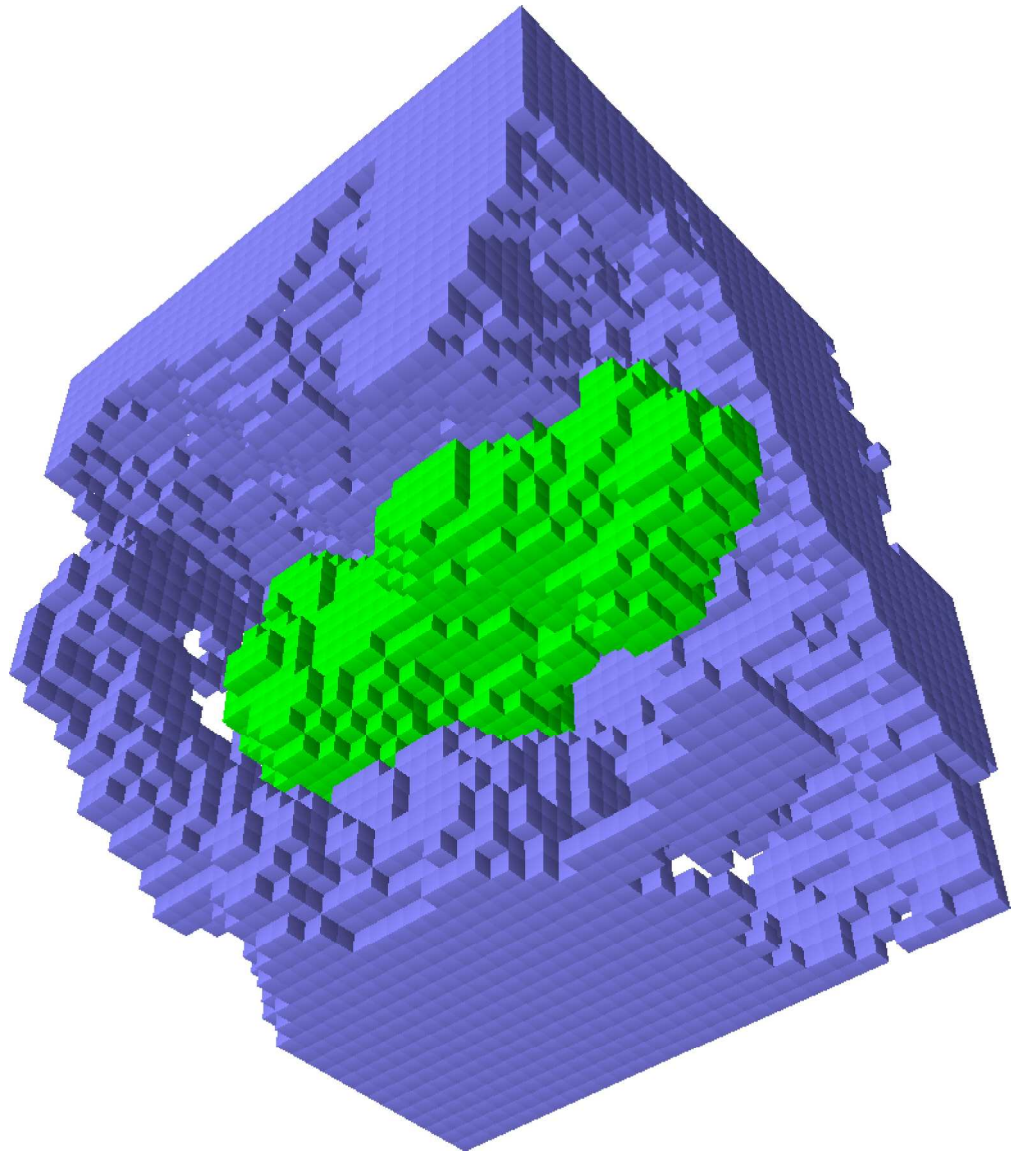

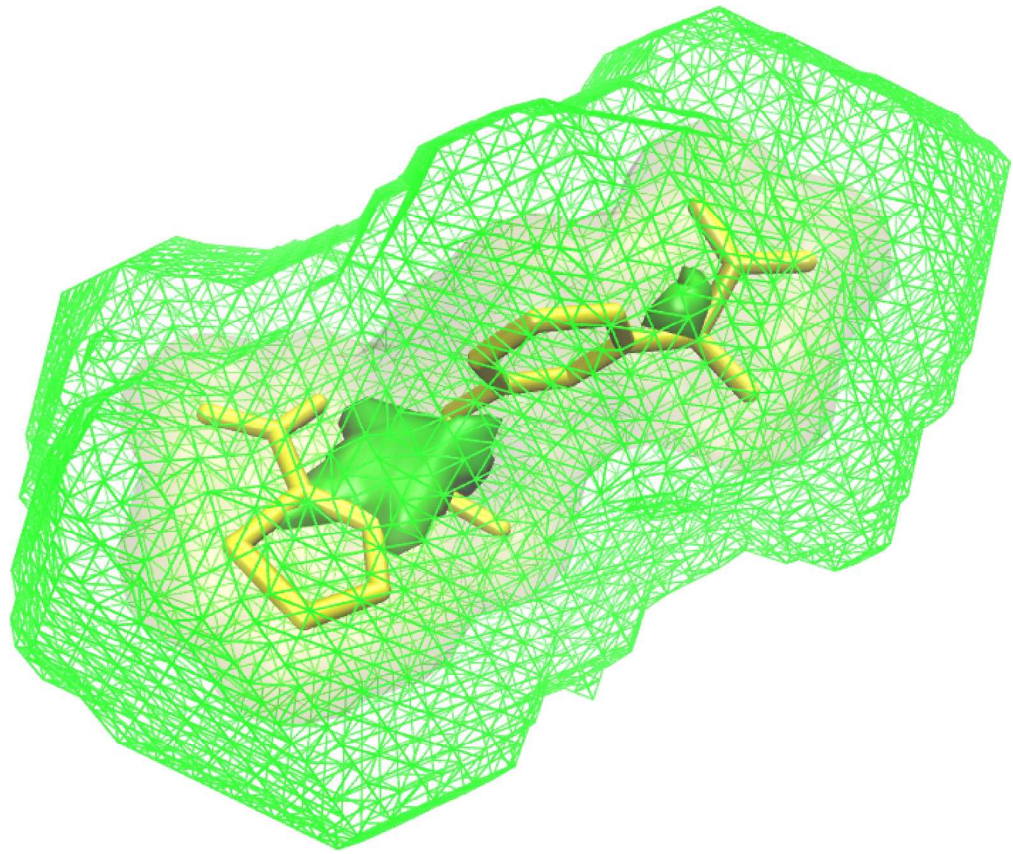

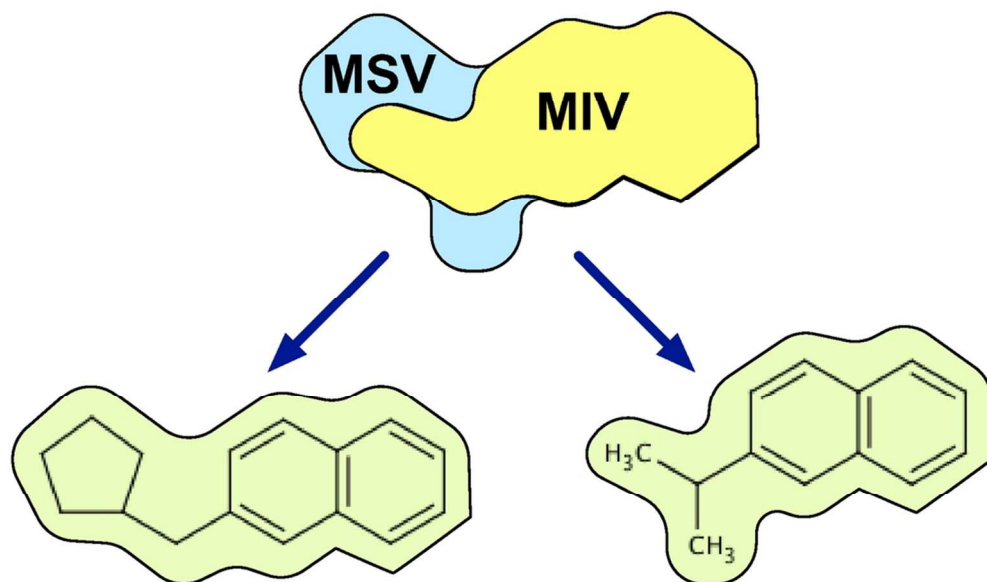



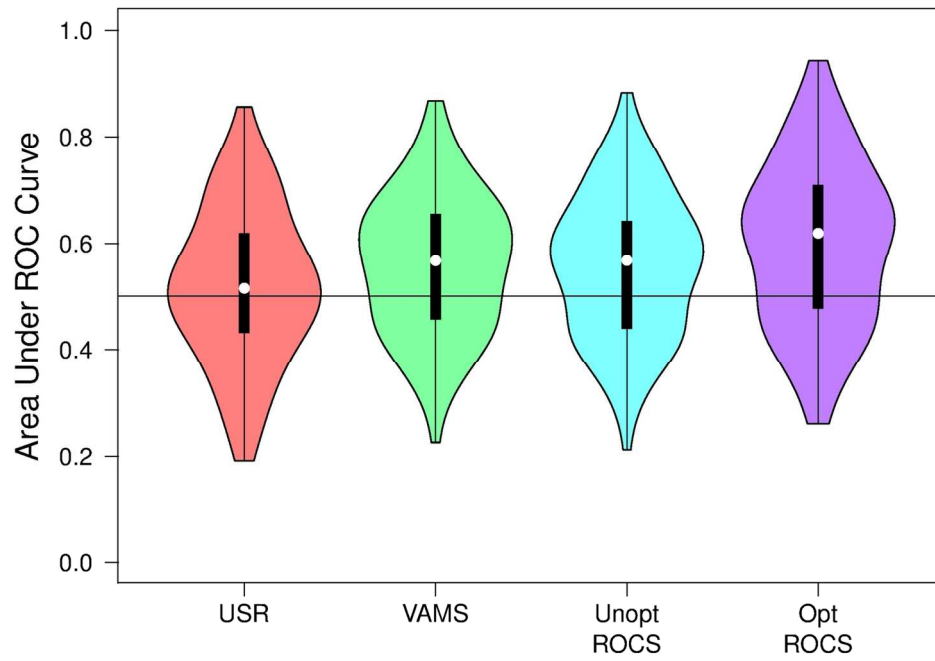

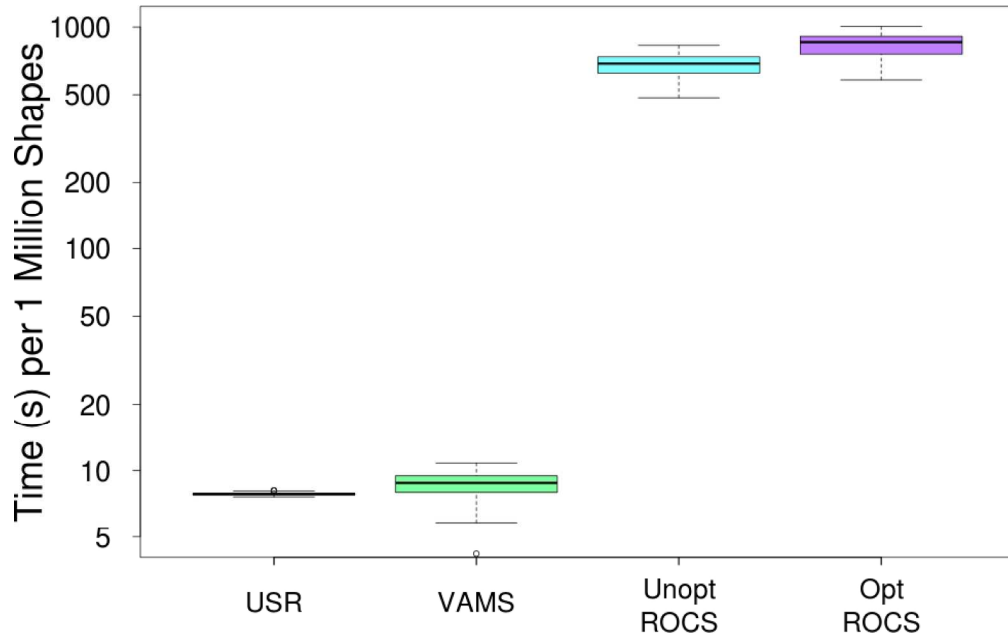

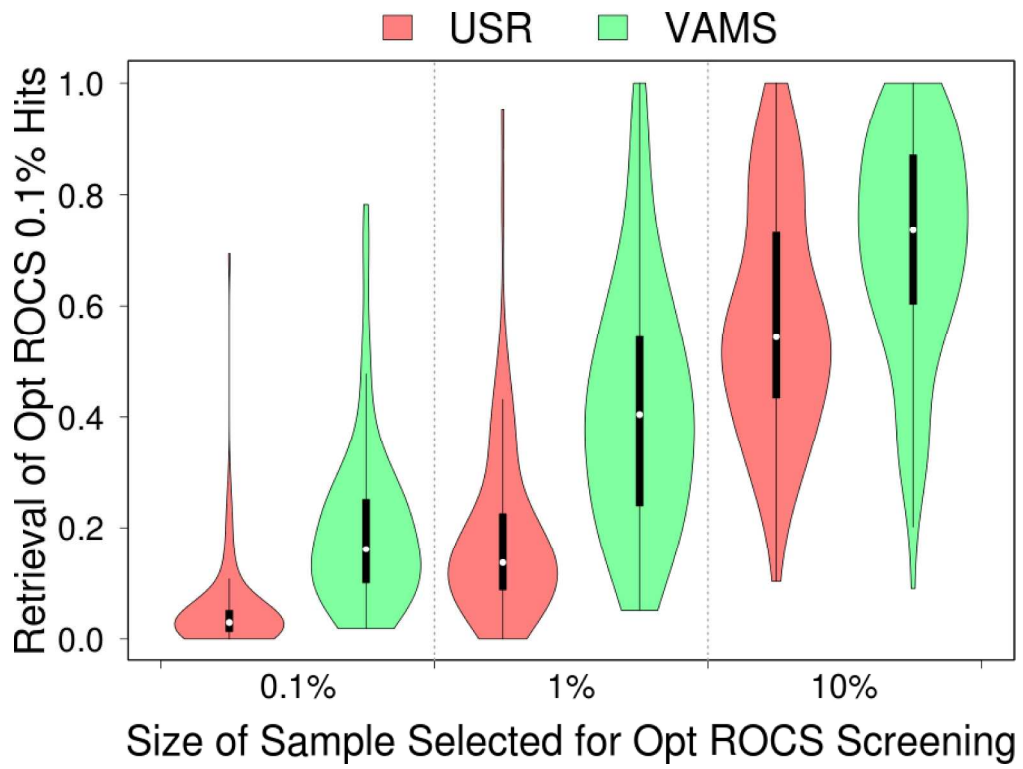

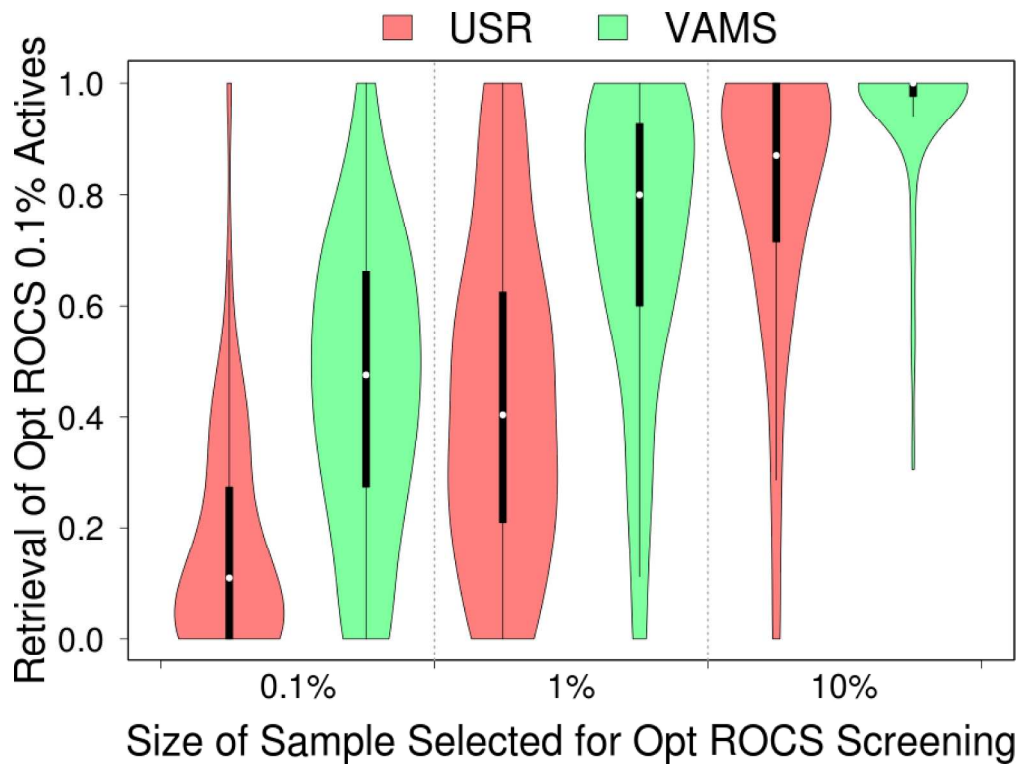

# Similarity Threshold

- 0.70
- 0.65
- 0.60
- 0.55
- 0.50

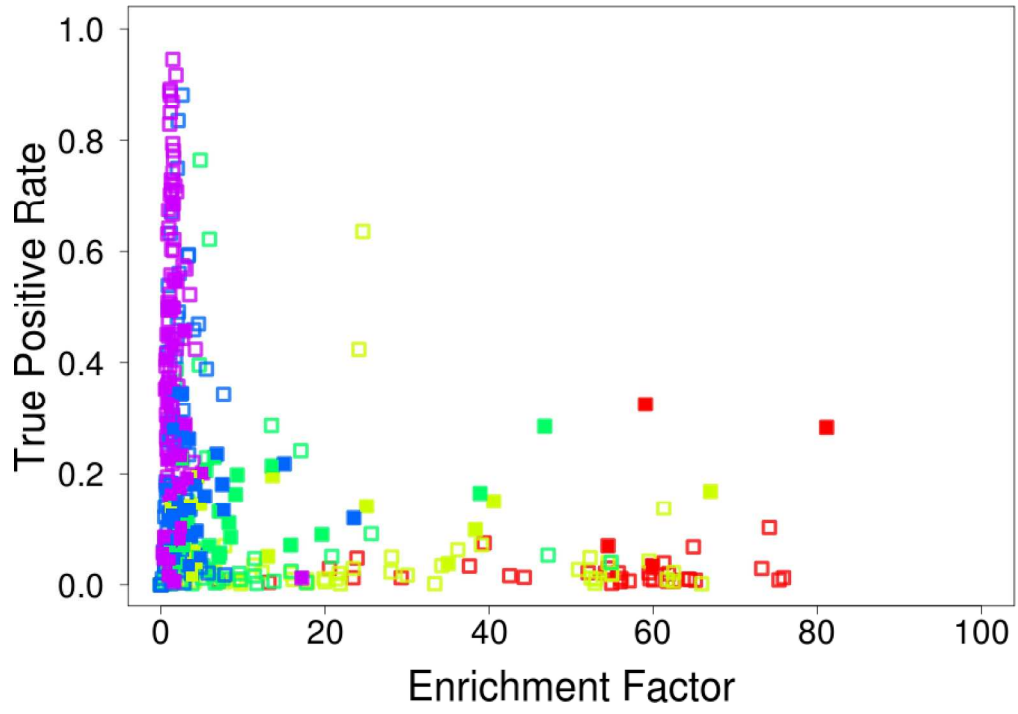

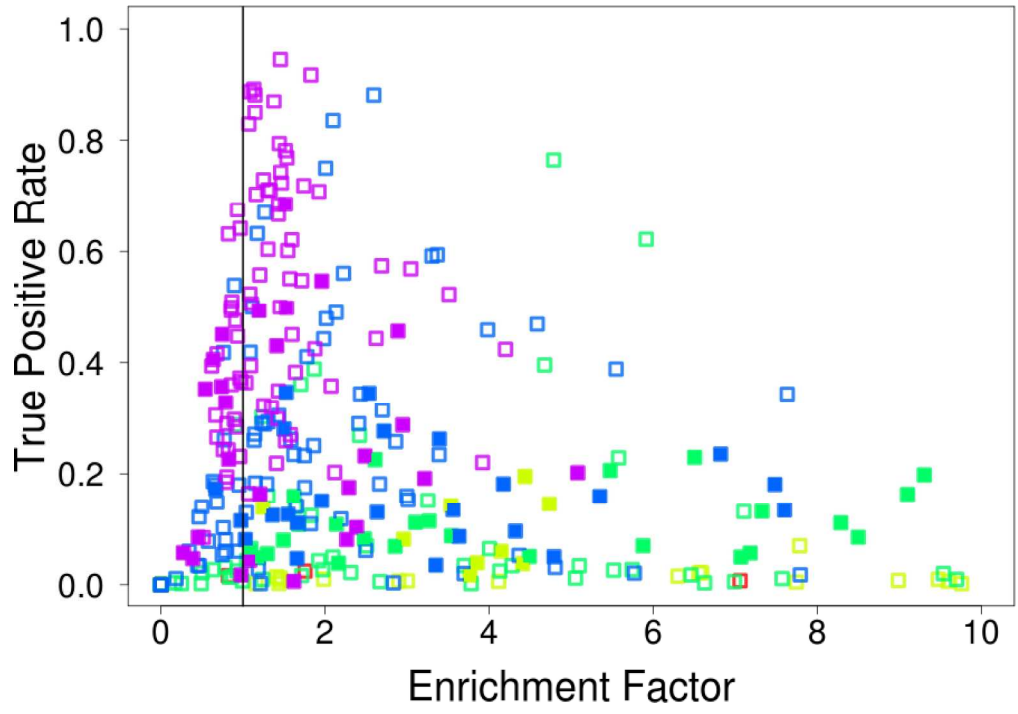

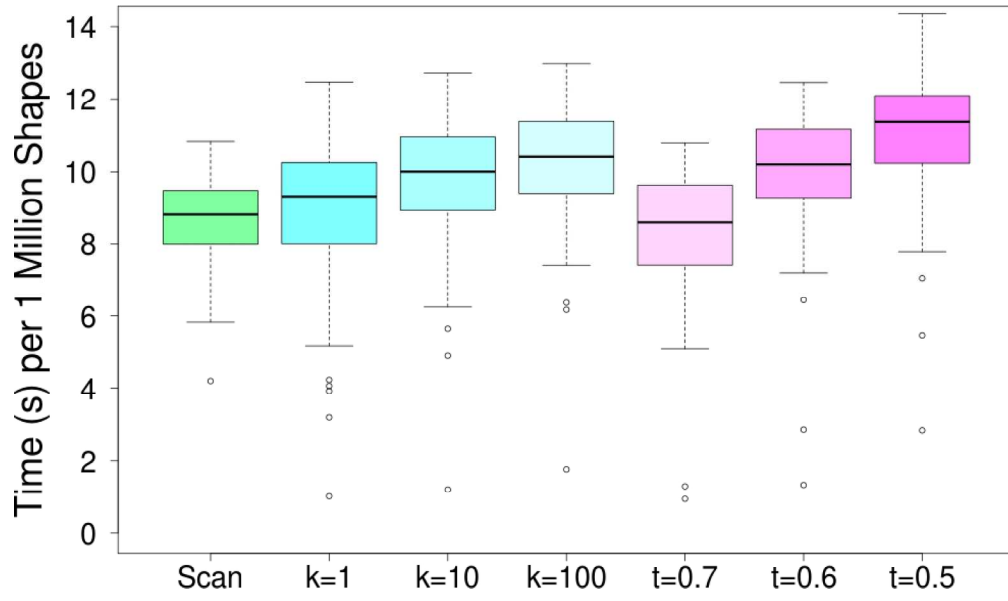



Gap Distance (Å)  
shrink grow

|   |     |     |
|---|-----|-----|
| ◆ | 1.0 | 1.0 |
| ◆ | 1.0 | 1.5 |
| ◆ | 1.0 | 2.0 |
| ◆ | 1.5 | 1.0 |
| ◆ | 1.5 | 1.5 |
| ◆ | 1.5 | 2.0 |
| ◆ | 2.0 | 1.0 |
| ◆ | 2.0 | 1.5 |
| ◆ | 2.0 | 2.0 |

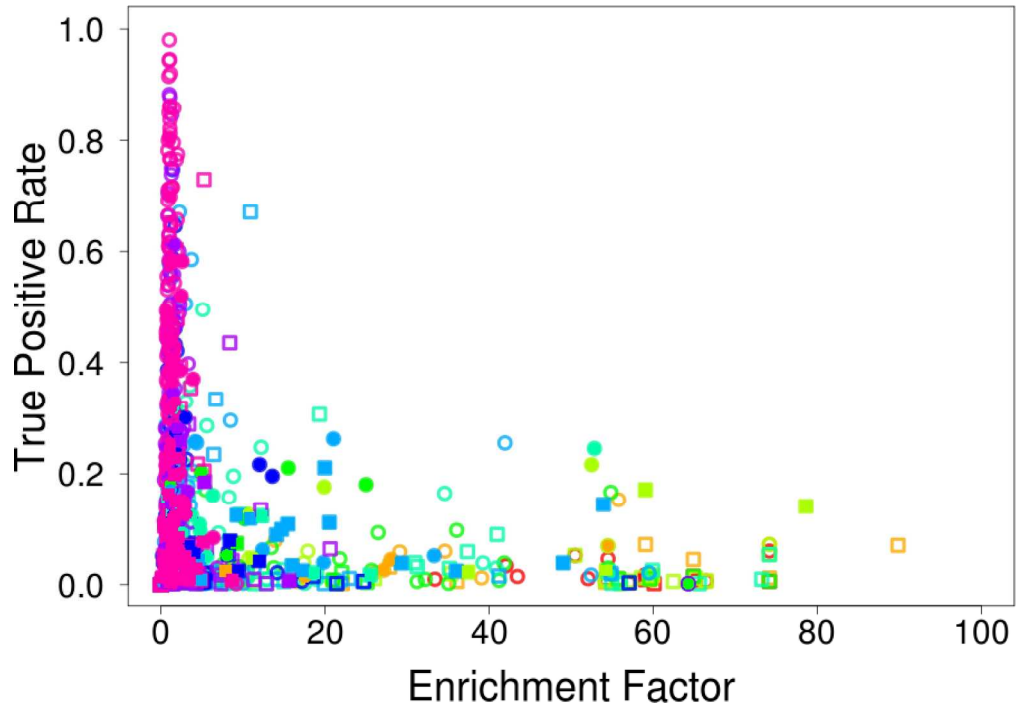

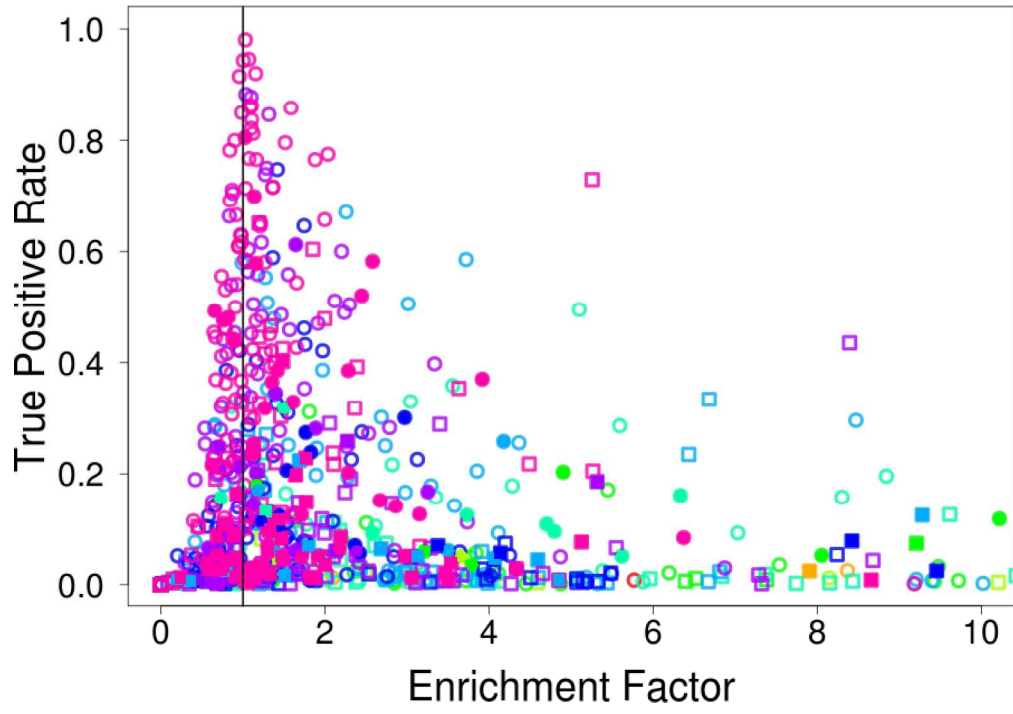

- Ligand Only
- Ligand-Receptor

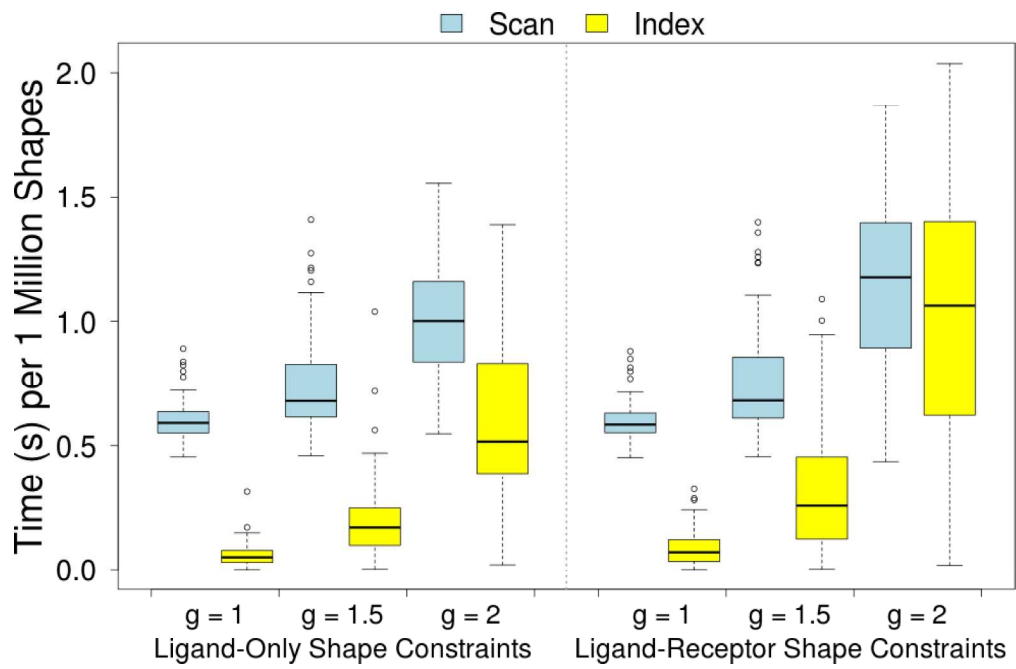

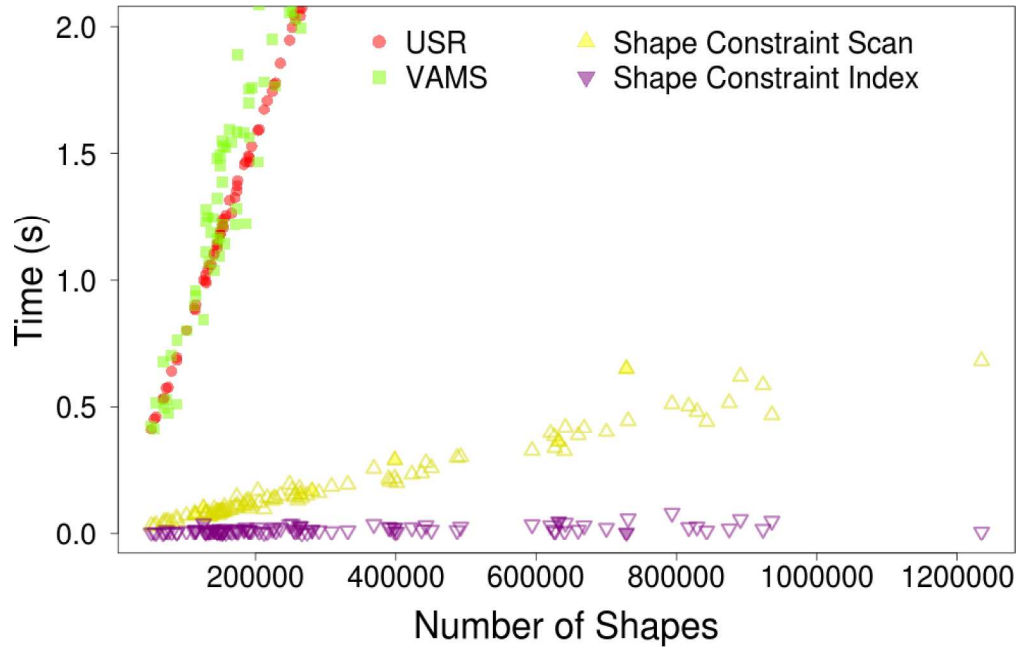

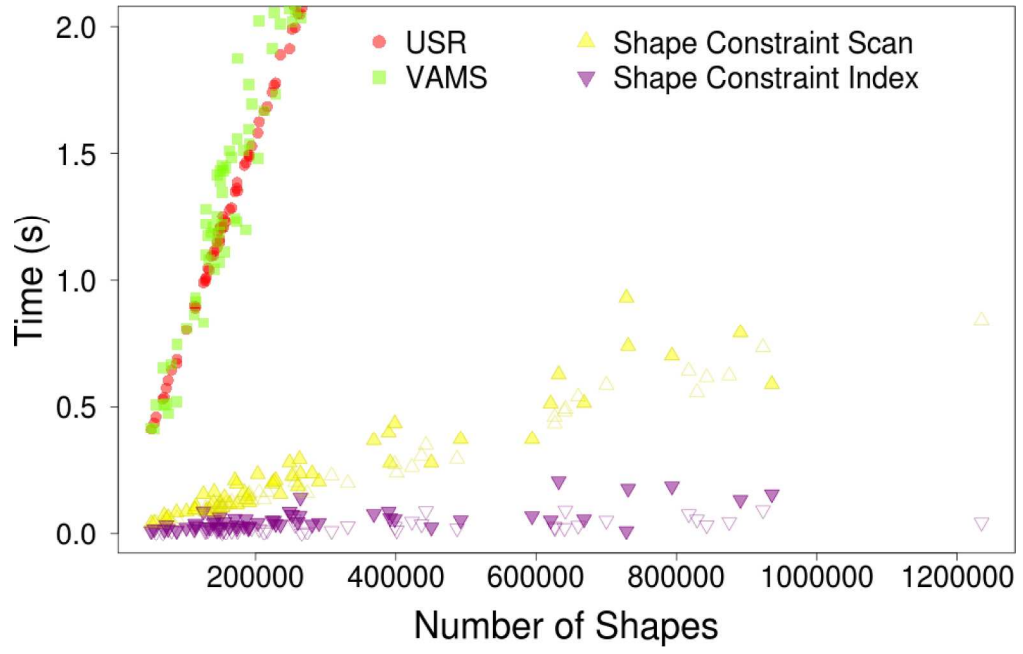

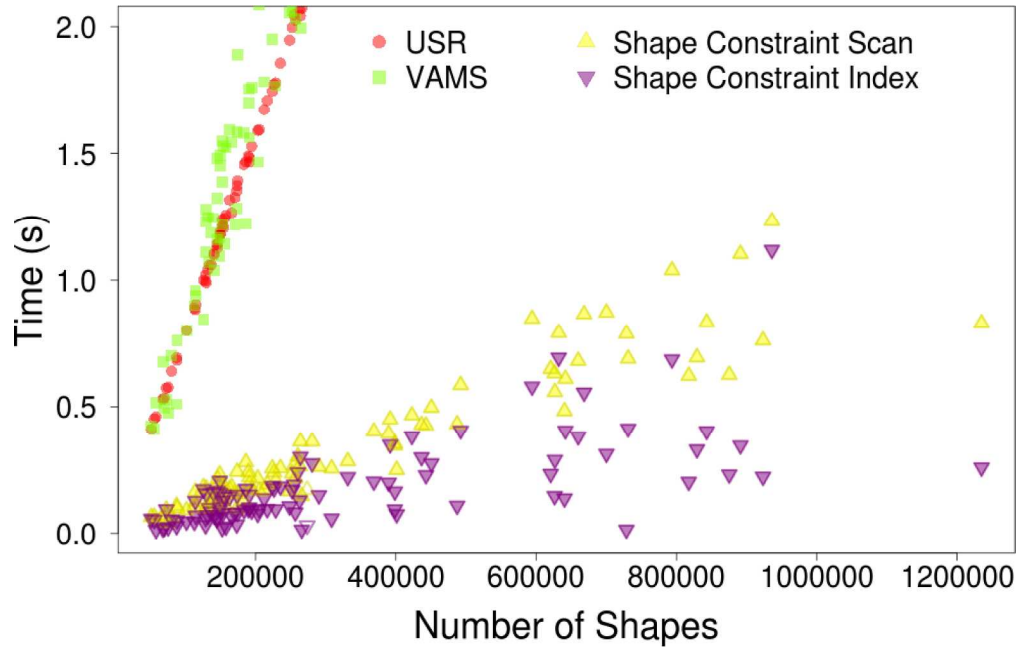



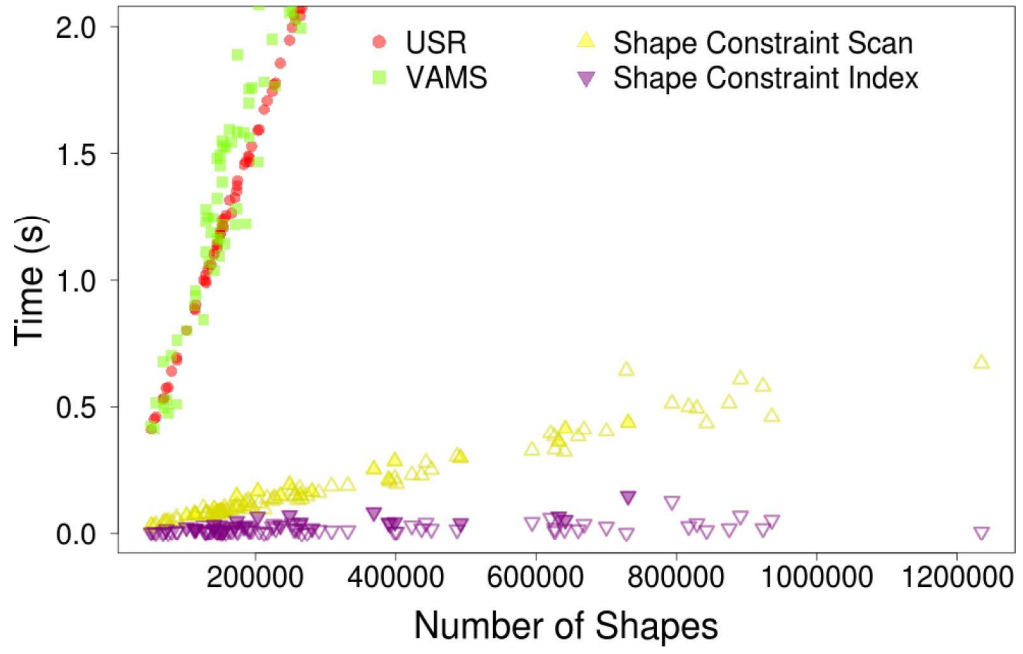

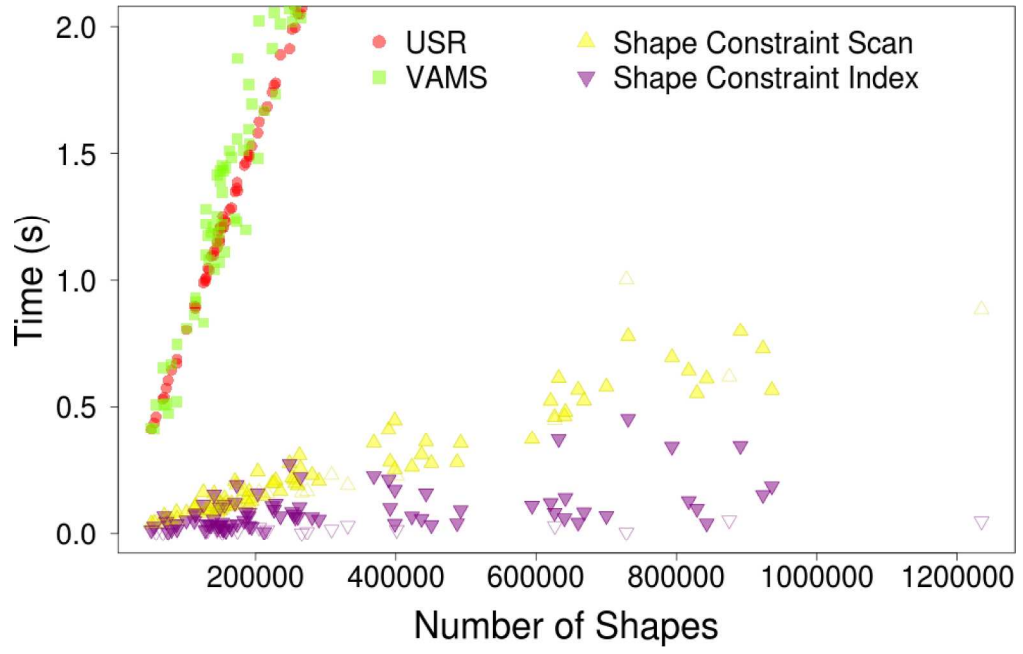

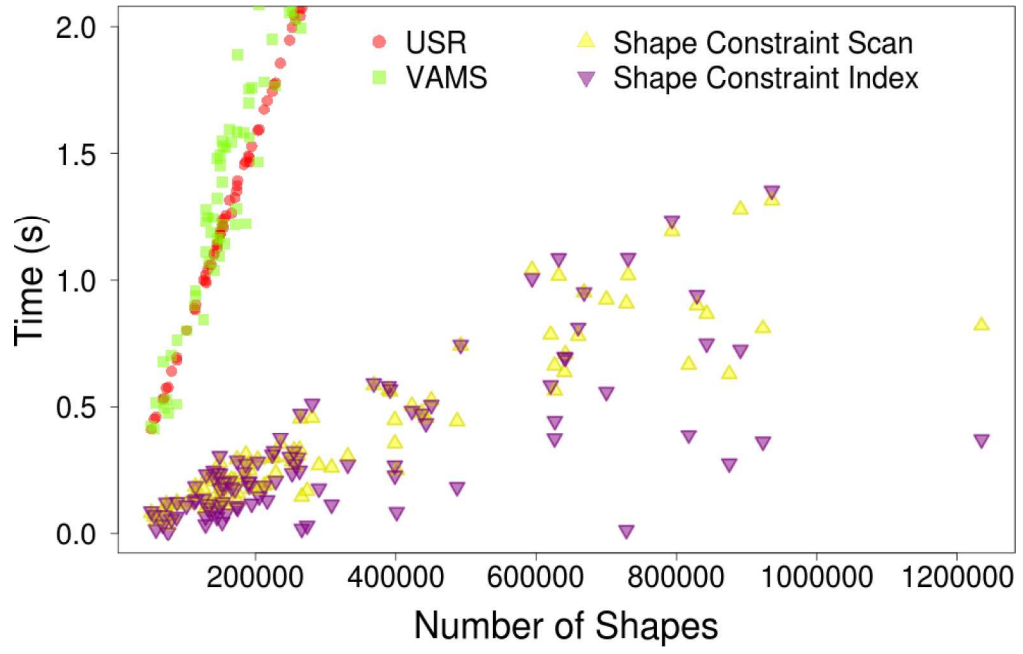

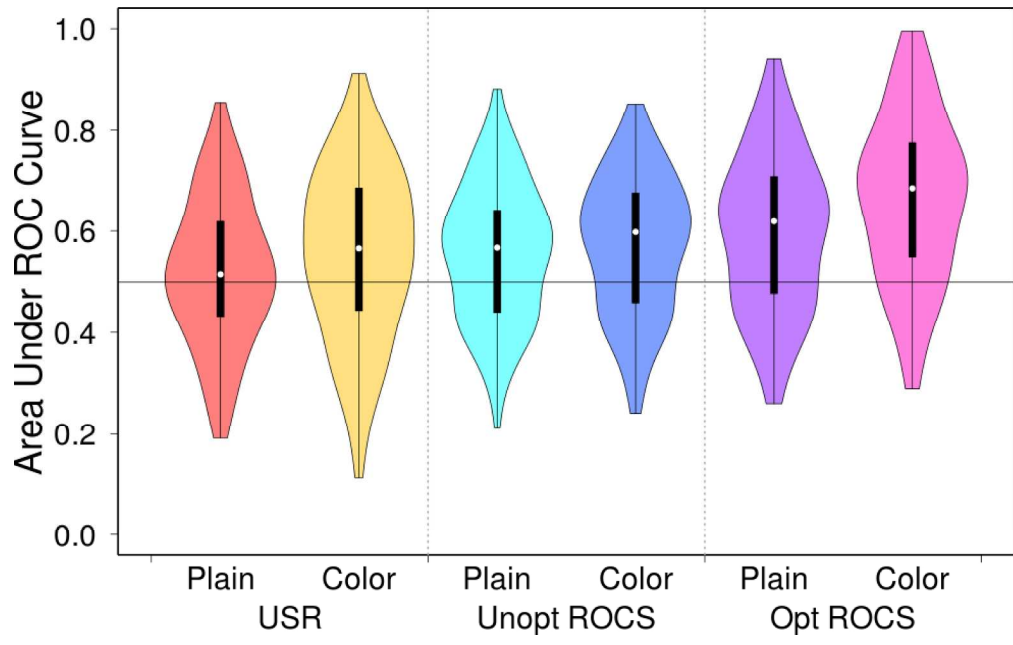

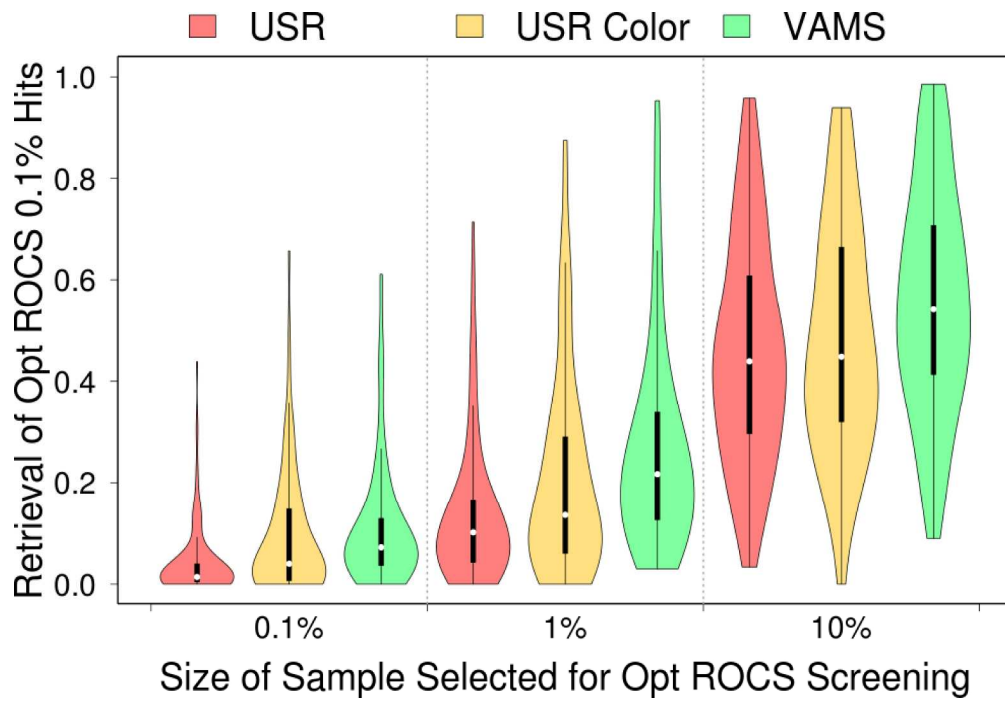

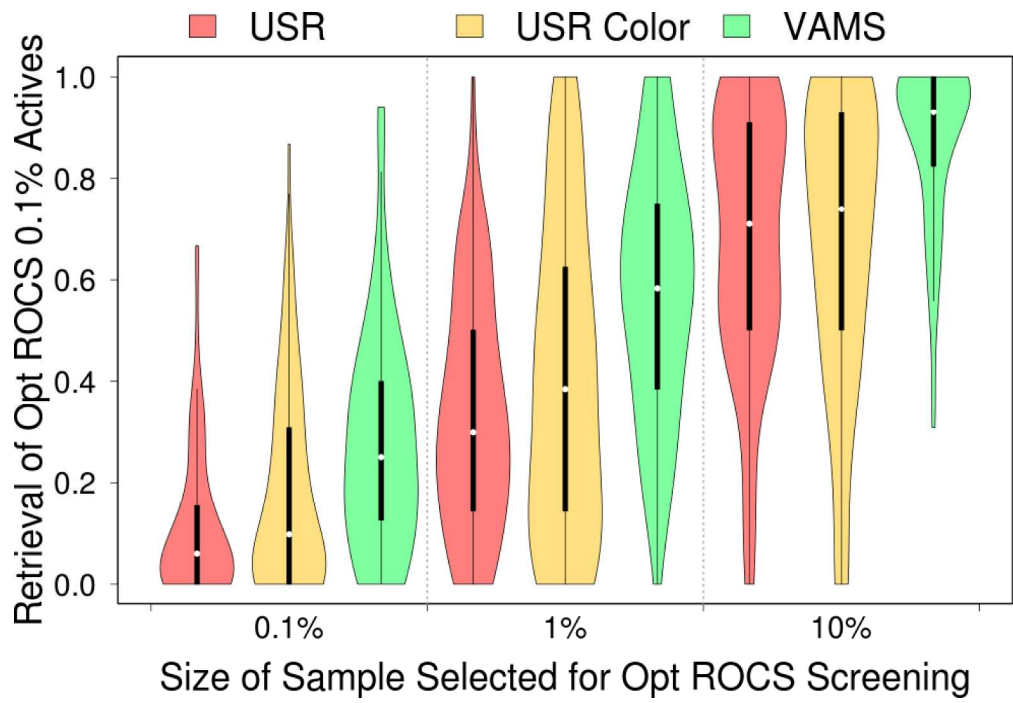

Volumetric aligned molecular shapes provide a way to screen libraries of molecular shapes that approaches the speed of the fastest shape-based methods and the accuracy of the most successful shape-based methods which are orders of magnitude slower. Volumetric aligned molecular shapes also offer a novel minimum/maximum shape constraint search that allows the user to precisely specify the desired shape and search millions of shapes in a fraction of a second.
